# Supplementary material for: Tead transcription factors differentially regulate cortical development
Source: PubMed Central journal article supplement (PMC7070074; doi:10.1038/s41598-020-61490-5), 2020-03-13
Supplement: 41598_2020_61490_MOESM2_ESM.pdf [file 41598_2020_61490_MOESM2_ESM.pdf]

# Tead transcription factors differentially regulate cortical development

Tanzila Mukhtar<sup>1</sup>, Jeremie Breda<sup>2,3</sup>, Zahra Karimaddini<sup>3,4</sup>, Pascal Grobecker<sup>2,3</sup>, Alice Grison<sup>1</sup>, Dagmar Iber<sup>3,4</sup>, Christian Beisel<sup>5</sup>, Erik van Nimwegen<sup>2,3</sup> and Verdon Taylor<sup>1,\*</sup>

## Affiliations:

<sup>1</sup> Department of Biomedicine, University of Basel, Mattenstrasse 28, CH-4058 Basel, Switzerland.

<sup>2</sup> Biozentrum, University of Basel, Klingelbergstrasse 50-70, CH-4056 Basel, Switzerland.

<sup>3</sup> Swiss Institute of Bioinformatics (SIB), Mattenstrasse 26, 4058 Basel, Switzerland.

<sup>4</sup> Computational Biology Group, D-BSSE, ETH Zürich, Mattenstrasse 26, CH-4058 Basel, Switzerland.

<sup>5</sup> Department of Biosystems Science and Engineering, ETH Zürich, 4058 Basel, Switzerland.

\*Corresponding author: Tel: +41 612075091; E-mail: [verdon.taylor@unibas.ch](mailto:verdon.taylor@unibas.ch)

# Supplementary Figures and Figure Legends

## Figure S1

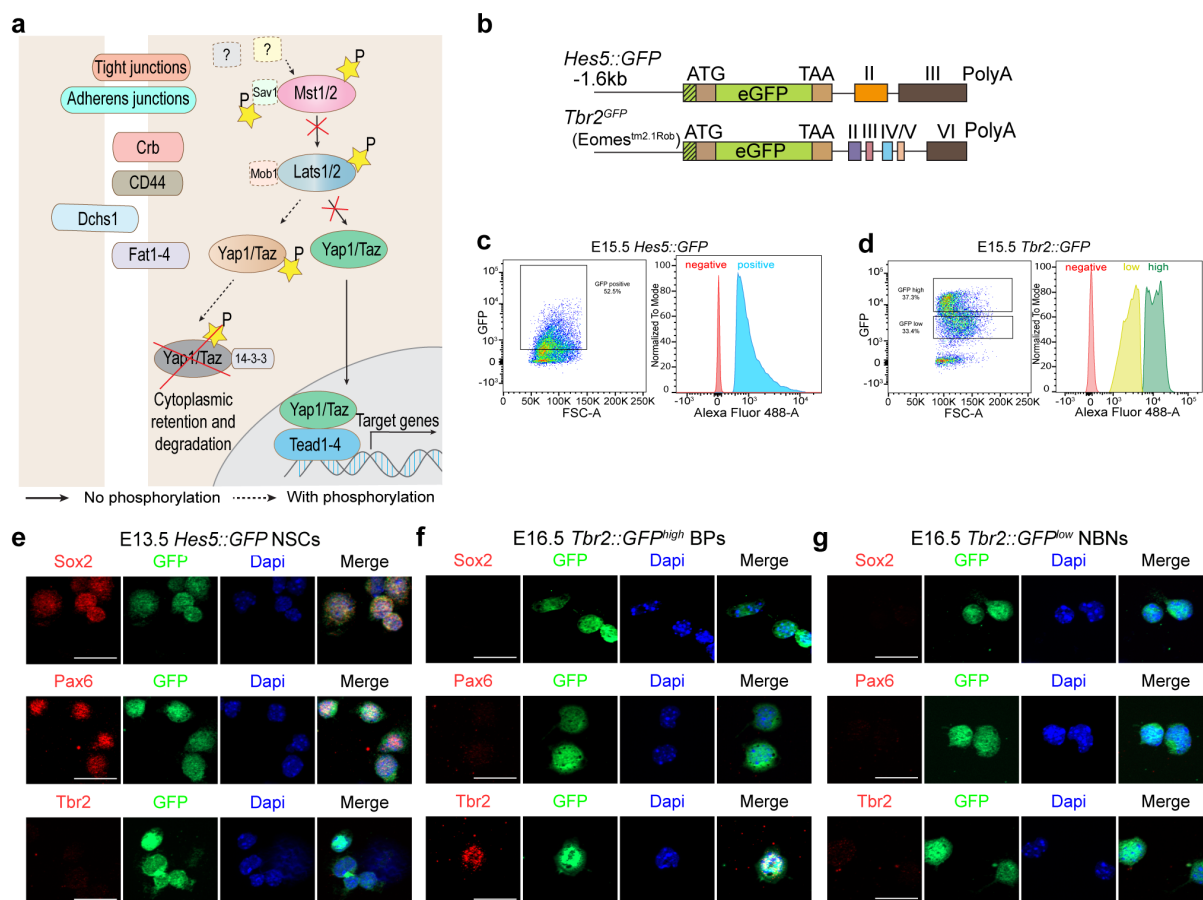

**Figure S1: Validation for RNA sequencing paradigm and transgenic mice.**

**a.** Schematic representation of Hippo signaling cascade. Illustration depicts series of sequential phosphorylation steps for co-activators Yap1/Taz, mediated by Mst1/2 and Lats1/2 kinases. If Hippo signaling is on, Yap1/Taz is phosphorylated, retained in the cytoplasm and degraded. If Hippo signaling is off, Yap1/Taz escapes phosphorylation and translocates to the nucleus, where it binds its partner TFs, e.g. Teads, to regulate transcription.

**b.** *Hes5::GFP* and *Tbr2::GFP* transgenic mice used for cell isolation.

**c.** Example of FACS plot for GFP<sup>+</sup> cell sorting from *Hes5::GFP* dorsal cortex at E15.5. Left plot shows the gating used to select GFP<sup>+</sup> cells. Right plot shows the GFP<sup>-</sup> (red) and GFP<sup>+</sup> (blue) cell populations.

**d.** Example of FACS plot for GFP<sup>+</sup> cell sorting from *Tbr2::GFP* dorsal cortex at E15.5. Left plot shows the gates used to select the two populations of GFP<sup>+</sup> cells. Right plot shows the GFP<sup>-</sup> (red), GFP<sup>low</sup> (yellow) and GFP<sup>high</sup> (green) cell populations.

**e-g.** Expression of progenitor markers (Sox2 and Pax6) and basal progenitor marker Tbr2 by *Hes5::GFP*<sup>+</sup> neural stem cells (NSCs) and *Tbr2::GFP<sup>high</sup>* basal progenitors (BP) and *Tbr2::GFP<sup>low</sup>* newborn neurons (NBNs) cells after FAC sorting. Scale bar = 20µm.

**Figure S2**

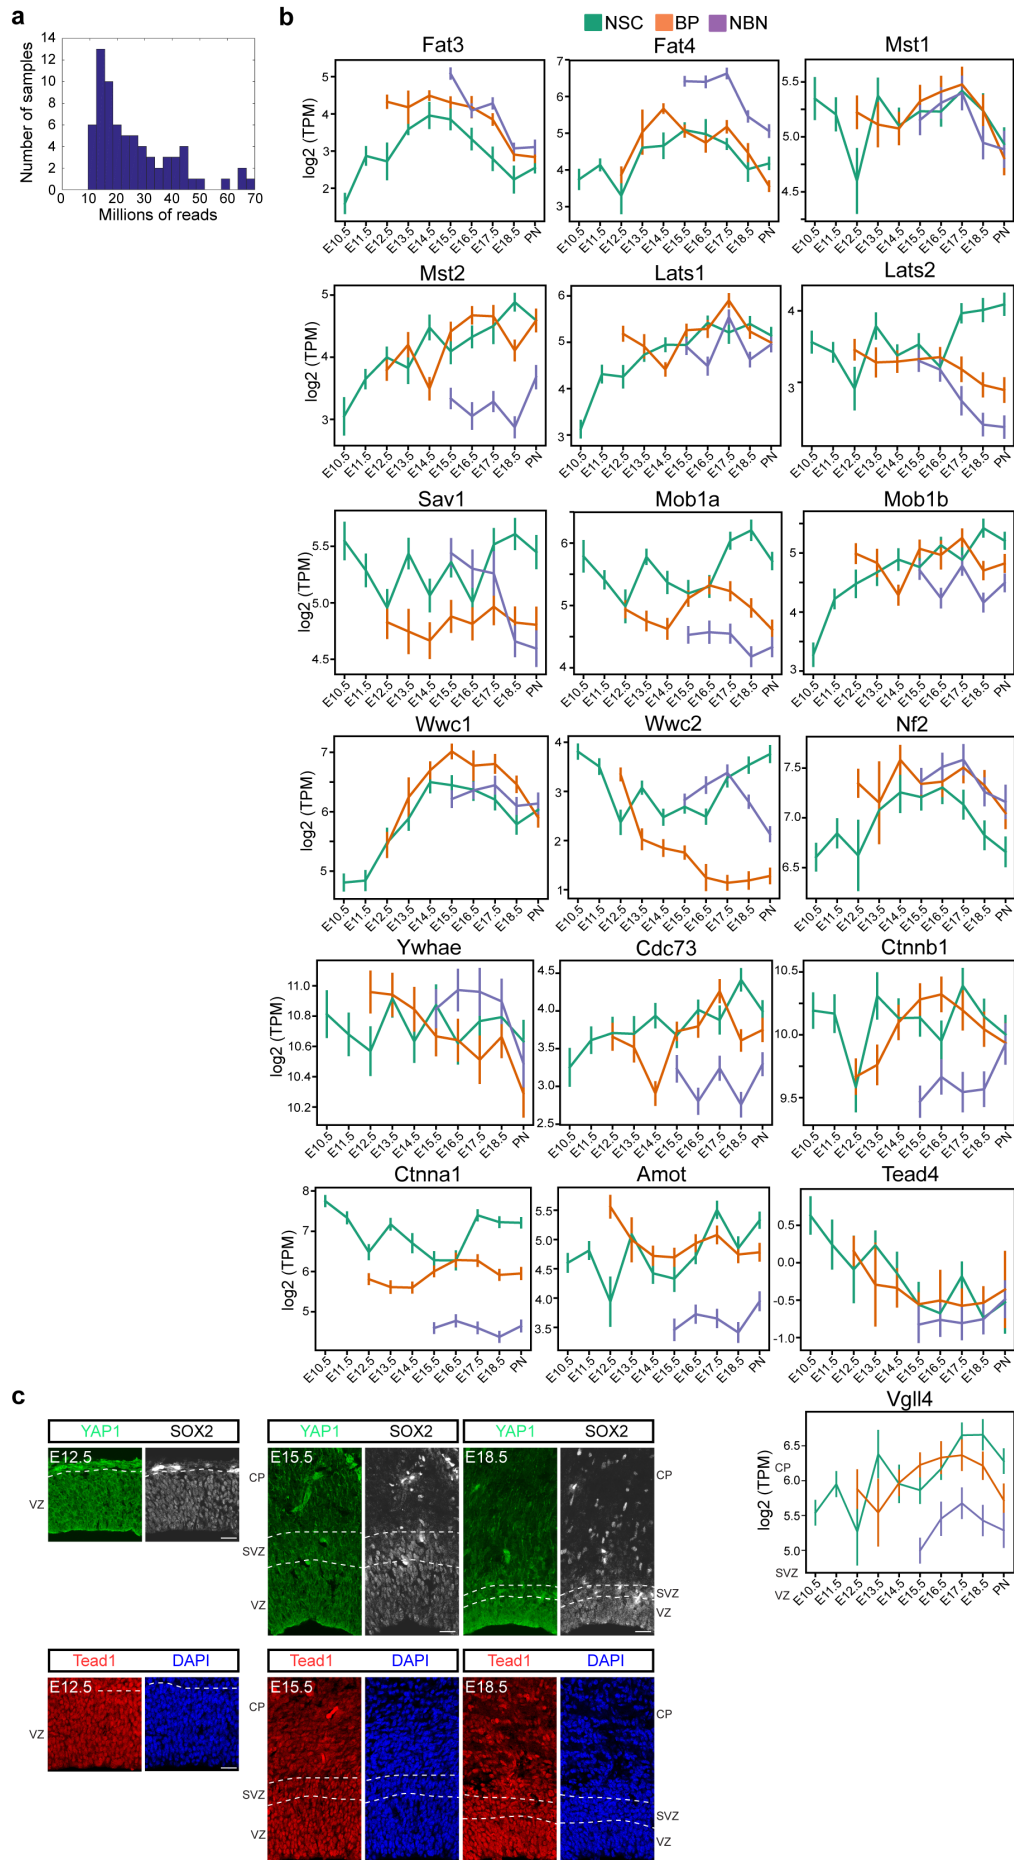

**Figure S2: Transcriptional Dynamics of additional Hippo signaling effectors in NSCs, BPs and NBNs from RNA sequencing.**

- a. Graphical representation of number of total RNA-seq reads over the samples.
- b. Expression profiles of components and intermediate effectors of Hippo signaling. Y-axis: mRNA level expressed as log<sub>2</sub> TPM (transcripts per million).
- c. Expression of Yap1 and Tead1 compared to the progenitor marker Sox2 in the developing cerebral cortex at E12.5, E15.5 and E18.5. Scale bars = 20μm.

**Figure S3**

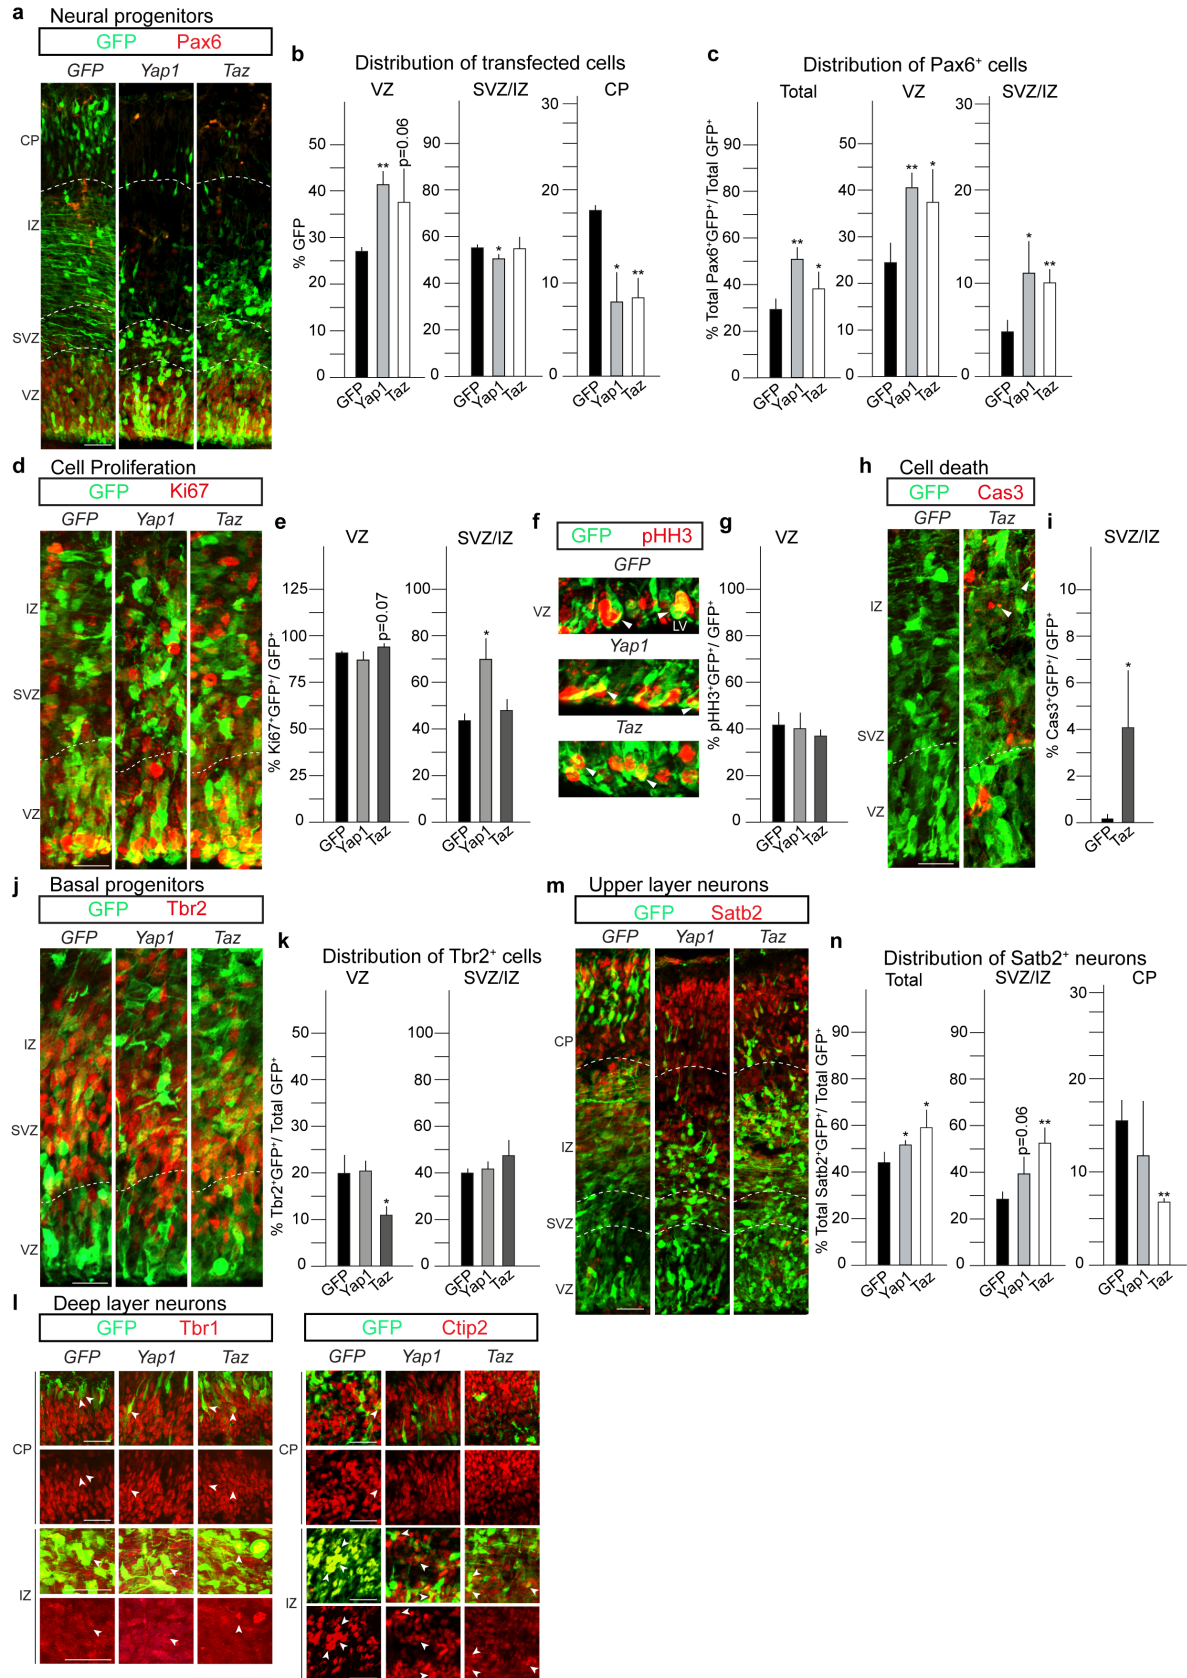

**Figure S3: Co-activators Yap1 and Taz overexpression increase percentage of NSCs and reduce differentiation.**

a. Coronal sections of transfected cortices immunostained for GFP and Pax6.

- b.** Quantification of distribution of GFP<sup>+</sup> transfected cells shows both Yap1 and Taz overexpression induce a similar phenotype.
  - c.** Quantification of Pax6<sup>+</sup>GFP<sup>+</sup> cells shows an increase in total Pax6<sup>+</sup> cells upon Yap1 and Taz overexpression, compared to GFP control in VZ, SVZ and total.
  - d.** Coronal sections of transfected cortices immunostained for GFP and Ki67.
  - e.** Quantification of Ki67<sup>+</sup>GFP<sup>+</sup> cells shows no change in total Ki67<sup>+</sup> cells upon Yap1 and Taz overexpression, compared to GFP control in VZ, increase is observed in SVZ upon Yap1 overexpression.
  - f.** Coronal sections of transfected cortices along the apical surface immunostained for GFP and pHH3.
  - g.** Quantification of pHH3<sup>+</sup>GFP<sup>+</sup> cells with their cell bodies lining the VZ shows no change in total pHH3<sup>+</sup> M-phase cells upon Yap1 and Taz overexpression, compared to GFP control in the apical VZ.
  - h.** Coronal sections of transfected cortices immunostained for GFP and Cas3.
  - i.** Quantification of Cas3<sup>+</sup>GFP<sup>+</sup> cells shows increase in total Cas3<sup>+</sup> cells upon Taz overexpression, compared to GFP control in SVZ/IZ.
  - j.** Coronal sections of transfected cortices immunostained for GFP and Tbr2.
  - k.** Quantification of Tbr2<sup>+</sup>GFP<sup>+</sup> cells shows a reduction in Tbr2<sup>+</sup> cells upon Taz overexpression compared to the GFP control.
  - l.** Transfected cortices immunostained for GFP and Tbr1 or Ctip2, showing GFP<sup>+</sup> deep layer neurons marker positive cells in the CP and IZ.
  - m.** Coronal sections of transfected cortices immunostained for GFP and Satb2, showing impaired migration of GFP<sup>+</sup> cells.
  - n.** Quantification of distribution of GFP<sup>+</sup> transfected cells shows both Yap1 and Taz overexpression increase total Satb2<sup>+</sup>GFP<sup>+</sup> cells in all cortical zones.
- Summaries of the quantifications are in Table S1. Scale bars = 20 μm in d and j, 50 μm in a, h, l and m. Data are shown as average ± SEM, \*p= 0.05, \*\*p= 0.01.

**Figure S4**

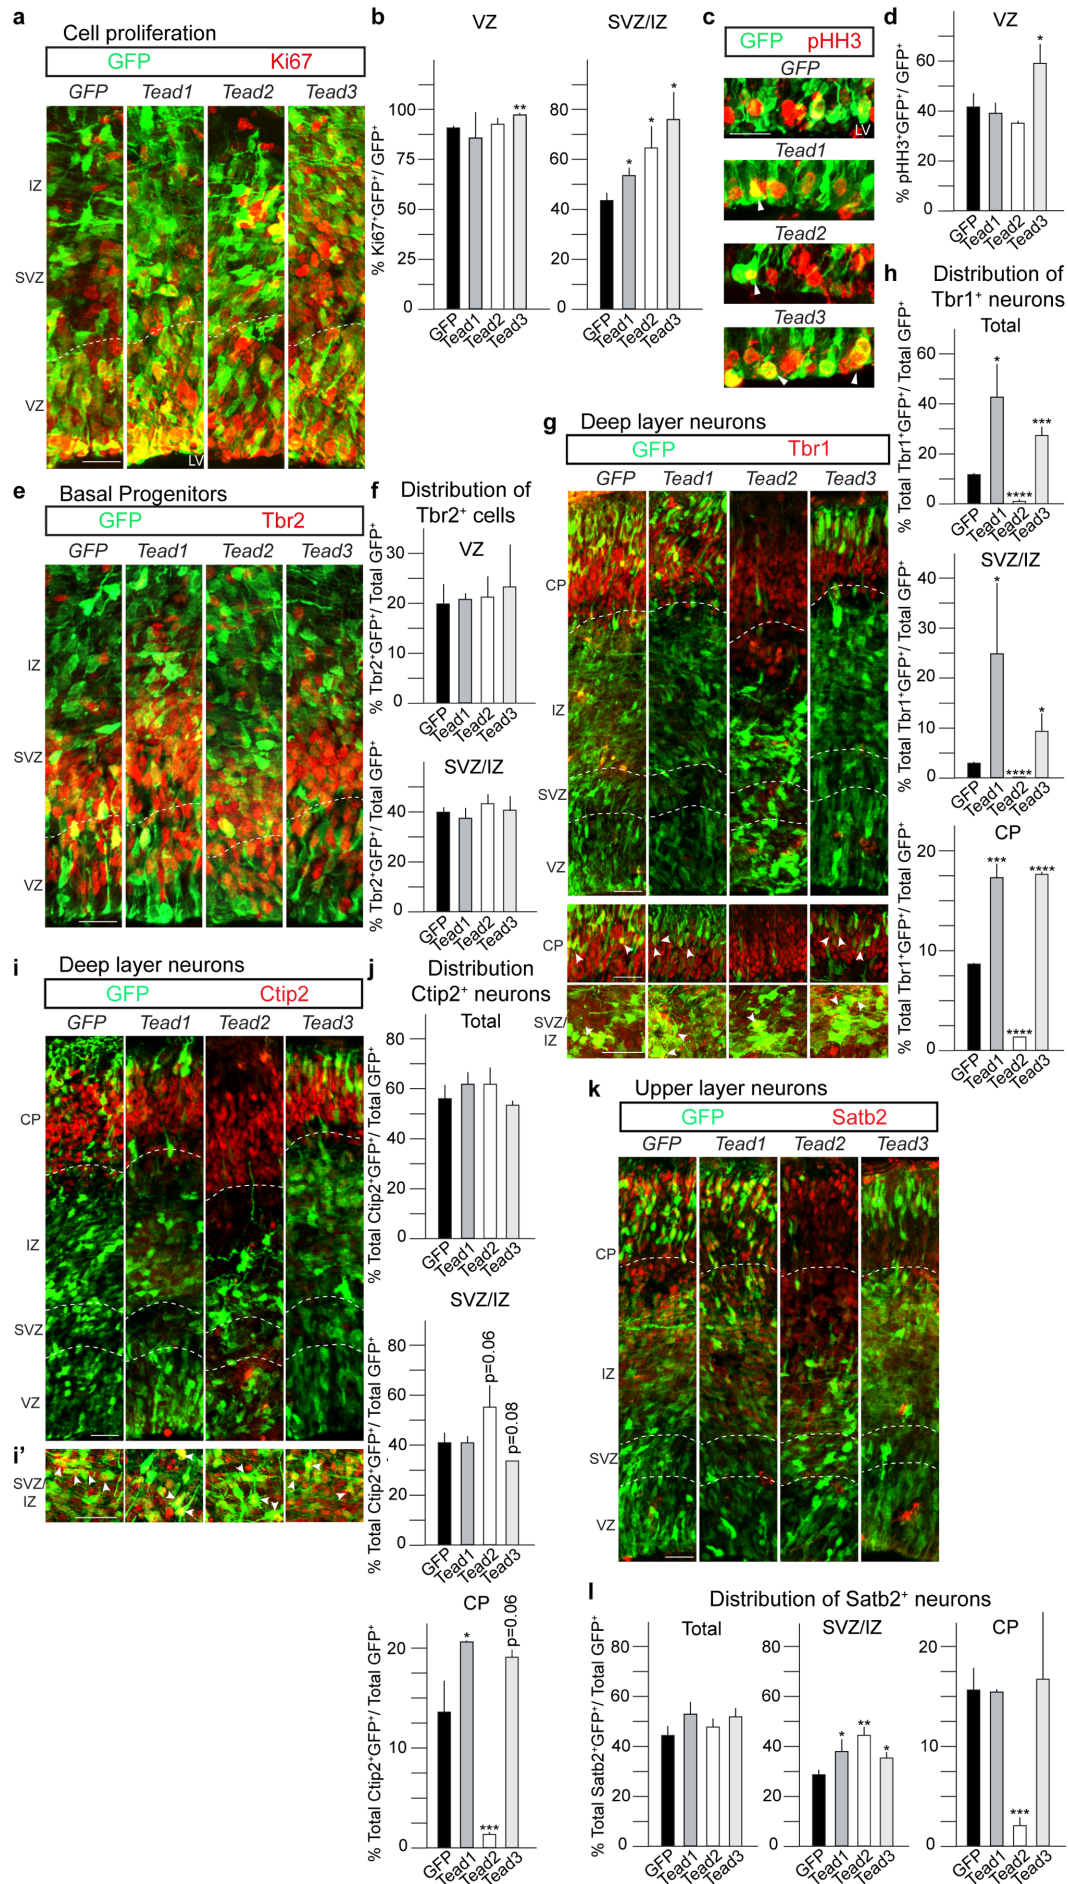

**Figure S4: Tead1, Tead2 and Tead3 overexpression affects cell fate and cortical layering.**

- a. Coronal sections of transfected cortices immunostained for GFP and Ki67.
- b. Quantification of Ki67<sup>+</sup>GFP<sup>+</sup> cells shows an increase in proliferation upon overexpression of Tead3 in VZ; and increase in proliferation in SVZ/IZ upon overexpression of all Tead1, Tead2 and Tead3.
- c. Coronal sections of transfected cortices along the apical surface, immunostained for GFP and pHH3.
- d. Quantification of pHH3<sup>+</sup>GFP<sup>+</sup> cells with their cell bodies lining the VZ upon Tead1, Tead2 and Tead3 overexpression, compared to GFP control in the apical VZ.
- e. Coronal sections of transfected cortices immunostained for GFP and Tbr2.
- f. Quantification of Tbr2<sup>+</sup>GFP<sup>+</sup> cells shows no change in BPs upon overexpression of Tead TFs.
- g. Coronal sections of transfected cortices immunostained for GFP and Tbr1.
- h. Quantification of distribution of GFP<sup>+</sup> transfected cells shows that both Tead1 and Tead3 overexpression induce a similar phenotype, an increase of Tbr1<sup>+</sup>GFP<sup>+</sup> cells in SVZ/IZ, CP and total. Tead2 overexpression shows an opposite phenotype to Tead1 and Tead3, with less Tbr1<sup>+</sup>GFP<sup>+</sup> cells in the CP and also a significant decrease in total.
- i-i''. Coronal sections of transfected cortices immunostained for GFP and Ctip2.
- j. Quantification of distribution of GFP<sup>+</sup> transfected cells shows both Tead1 and Tead3 overexpression induce a similar phenotype, an increase of Ctip2<sup>+</sup>GFP<sup>+</sup> cells in CP and no changes in total.
- k. Coronal sections of transfected cortices immunostained for GFP and Satb2.
- l. Quantification of Satb2<sup>+</sup>GFP<sup>+</sup> cells over total GFP<sup>+</sup> cells shows a decrease in Satb2<sup>+</sup>GFP<sup>+</sup> cells in CP upon Tead2 overexpression, compared to GFP control. Satb2<sup>+</sup>GFP<sup>+</sup> cells remain unchanged upon overexpression of Tead1 and Tead3.

Summaries of the quantifications are in Table S2. Scale bars = 50  $\mu$ m. Data are shown as average  $\pm$  SEM, \*p= 0.05, \*\*p= 0.01, \*\*\*p=0.001, \*\*\*\*<p=0.0001.



**Figure S5**

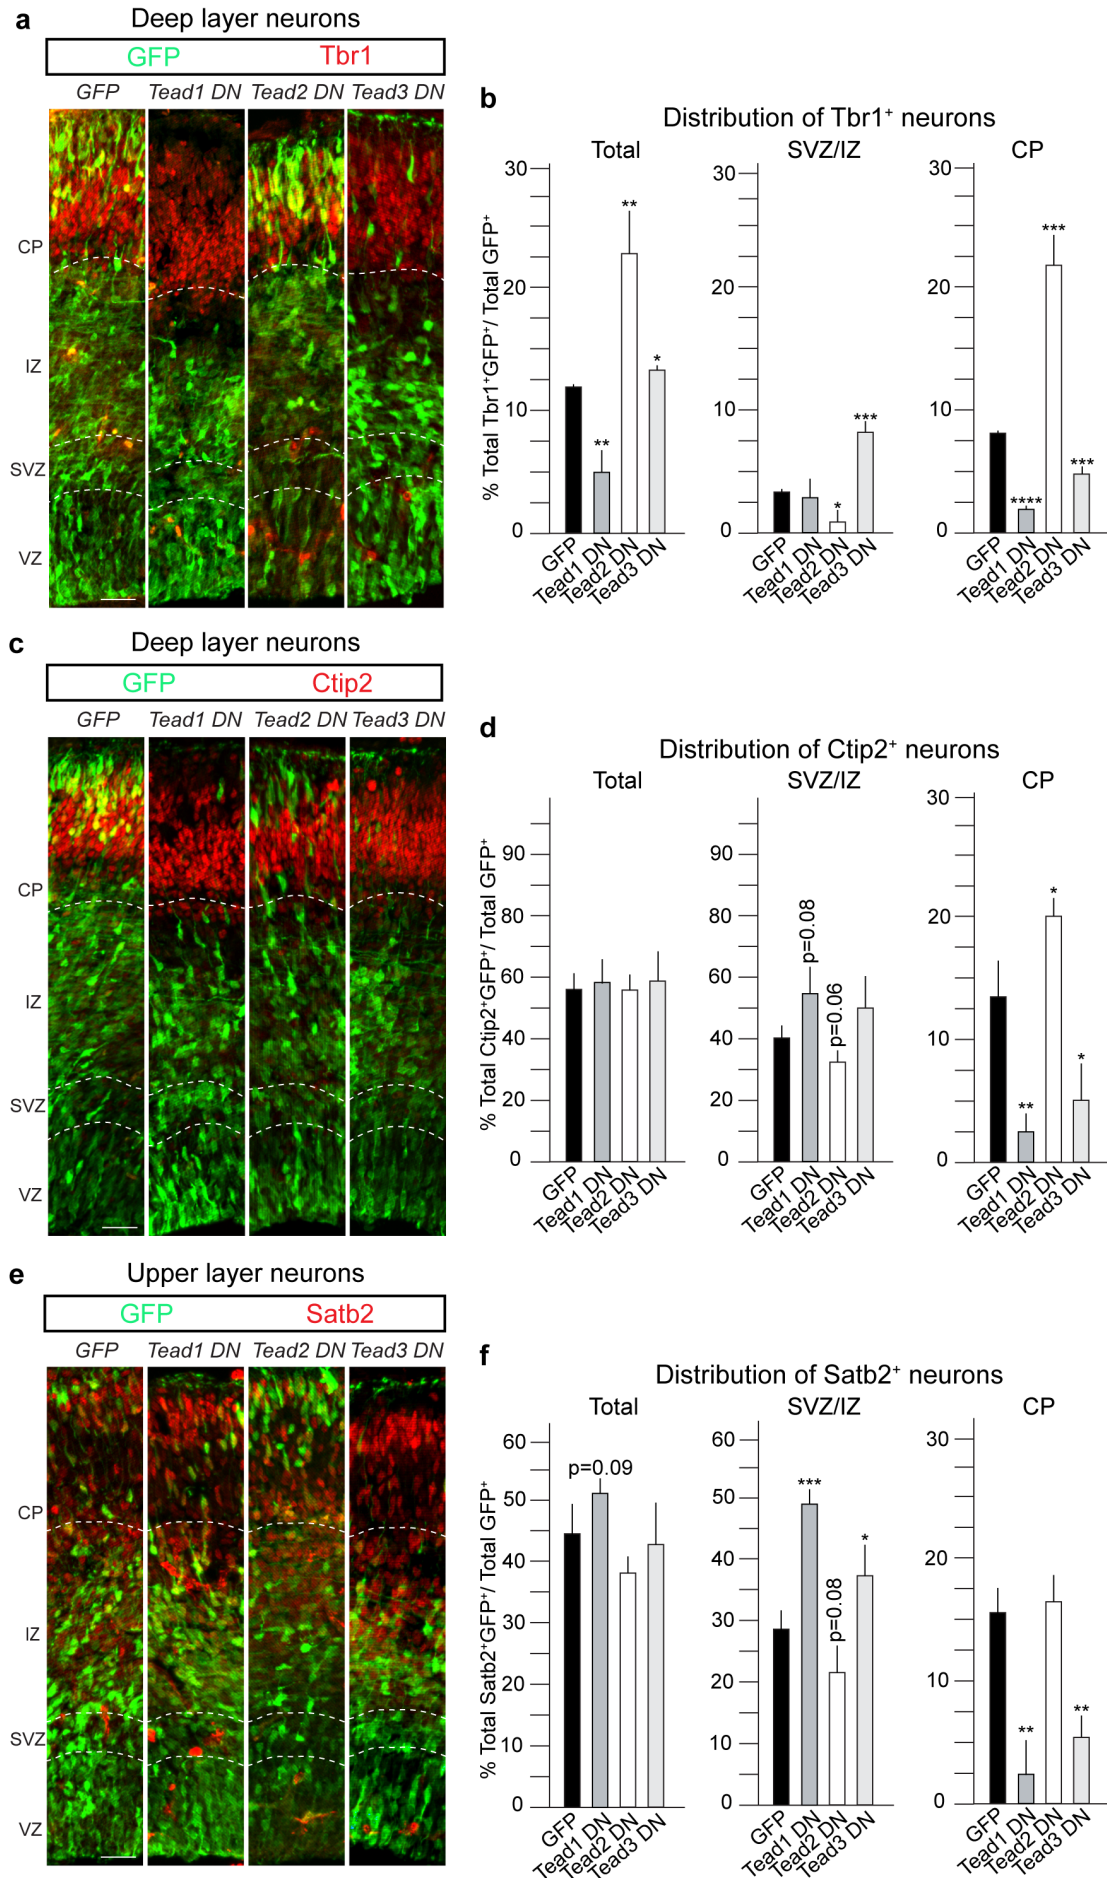

**Figure S5: Tead1 DN, Tead2 DN and Tead3 DN constructs affect cell fate and cortical layering.**

**a.** Coronal sections of transfected cortices immunostained for GFP and Tbr1.

**b.** Quantification of fate changes in deep layer Tbr1<sup>+</sup> neurons, shows a decrease of Tbr1<sup>+</sup>GFP<sup>+</sup> cells in CP upon Tead1 DN and Tead3 DN transfection. This is opposite to the phenotype with Tead2 DN, with an increase of Tbr1<sup>+</sup>GFP<sup>+</sup> cells in CP. Similar changes are observed in total Tbr1<sup>+</sup>GFP<sup>+</sup> cells.

**c.** Coronal sections of transfected cortices immunostained for GFP and Ctip2.

**d.** Quantification of fate changes in deep layer Ctip2<sup>+</sup> neurons, shows a decrease of Ctip2<sup>+</sup>GFP<sup>+</sup> cells in CP upon Tead1 DN and Tead3 DN transfection. This is opposite to the phenotype with Tead2 DN, with an increase of Ctip2<sup>+</sup>GFP<sup>+</sup> cells in CP. The total cell numbers remain unchanged; hence the manipulations only affect the migration of Ctip2<sup>+</sup>GFP<sup>+</sup> cells.

**e.** Coronal sections of transfected cortices immunostained for GFP and Satb2.

**f.** Quantification of distribution of GFP<sup>+</sup> transfected cells shows both Tead1 and Tead3 overexpression induce a similar phenotype, a decrease of Satb2<sup>+</sup>GFP<sup>+</sup> cells in CP and no changes in total.

Summaries of the quantifications are in Table S3. Scale bars = 50  $\mu$ m. Data are shown as average  $\pm$  SEM, \*p= 0.05, \*\*p= 0.01, \*\*\*p=0.001, \*\*\*\*<p=0.0001.

**Figure S6**

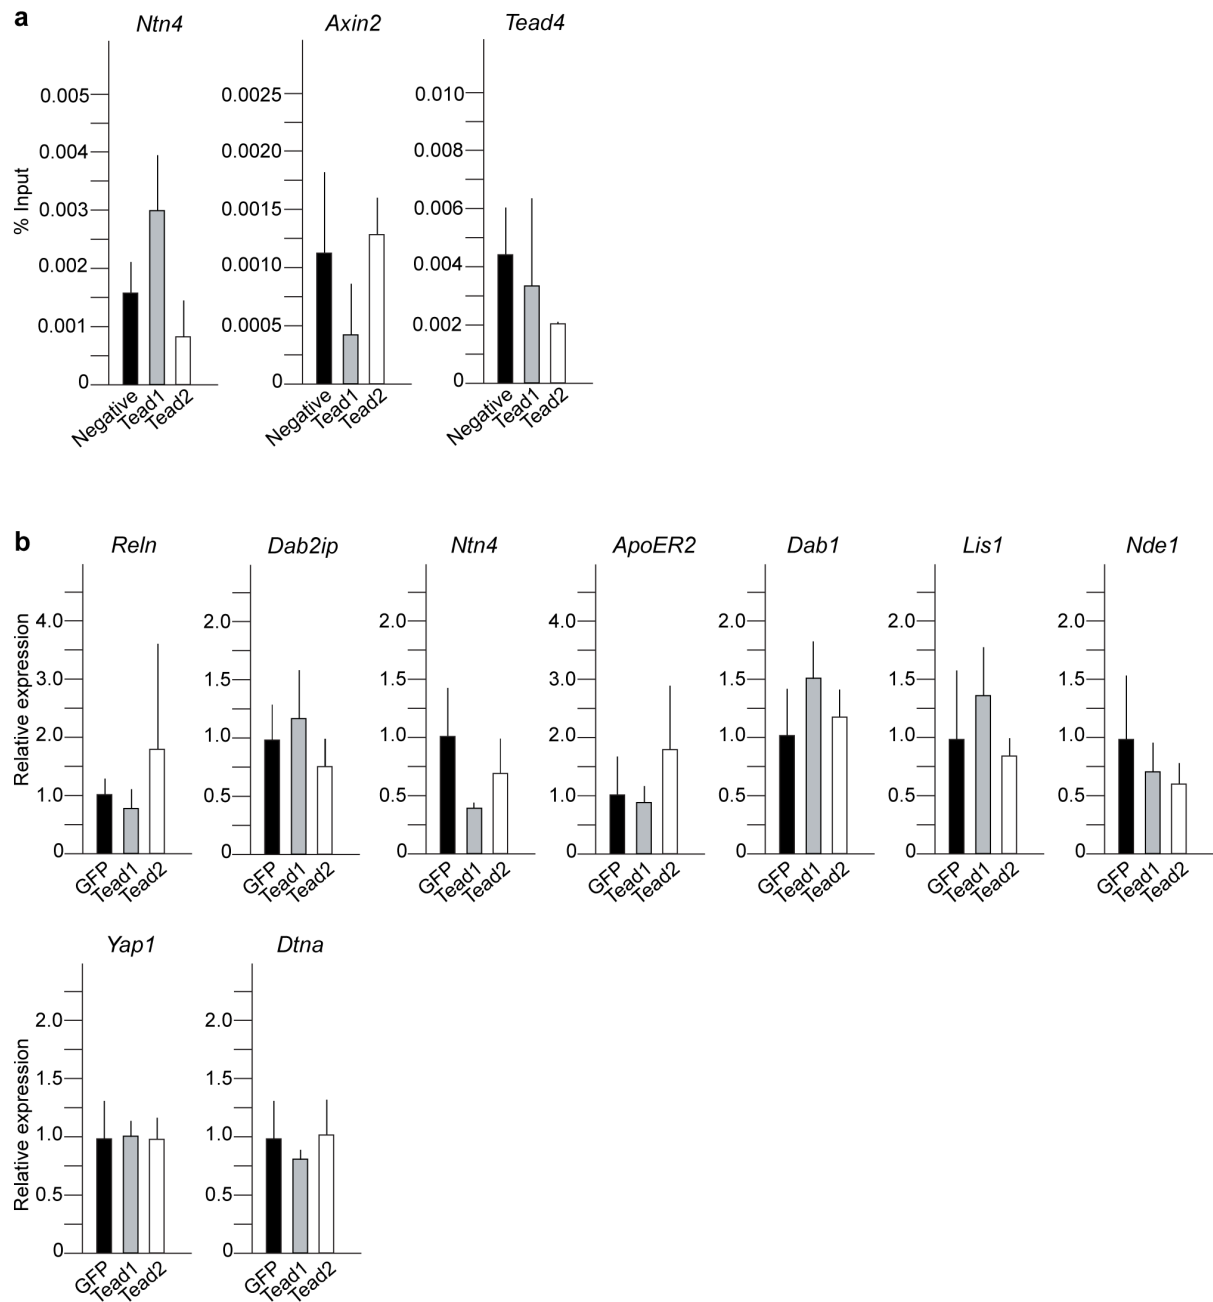

**Figure S6: Additional ISMARA predicted targets tested by RT-qPCR and ChIP-PCR.**

**a.** ChIP-qPCR does not pull-down *Ntn4*, *Axin2* and *Tead4* with both *Tead1* and *Tead2*. An empty mCherry vector was used as the negative control.

**b.** Relative expression of *Reln*, *Dab2ip*, *Ntn4*, *ApoER2*, *Dab1*, *Lis1*, *Nde1*, *Yap1* and *Dtna* show no significant changes upon overexpression of both *Tead1* and *Tead2*.

Summaries of the quantifications are in Table S5. Data are shown as average  $\pm$  SEM.

**Figure S7**

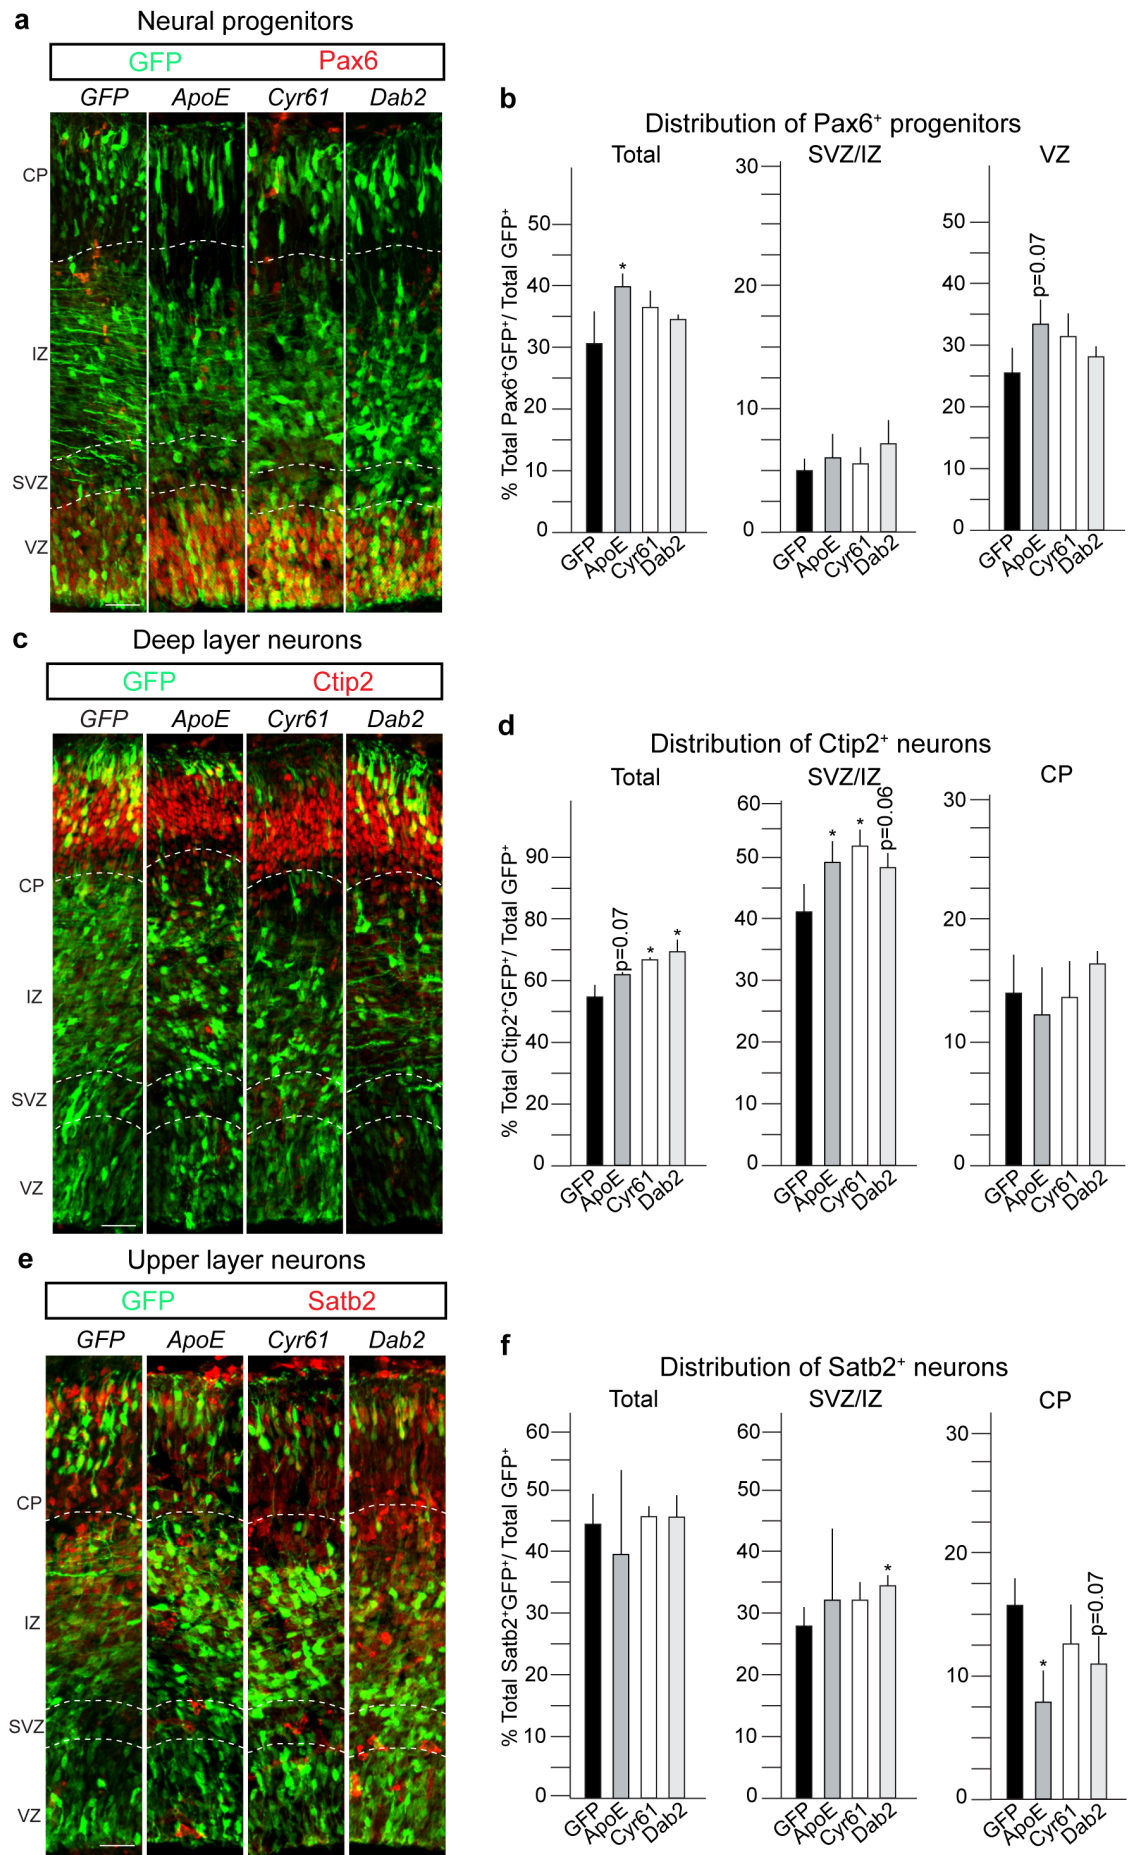

**Figure S7: Overexpression of ApoE, Cyr61 and Dab2 affects cell fate and cortical layering.**

- a. Coronal sections of transfected cortices immunostained for GFP and Pax6.
- b. Quantification of Pax6<sup>+</sup>GFP<sup>+</sup> cells shows an increase in total Pax6<sup>+</sup> cells upon ApoE overexpression.
- c. Coronal sections of transfected cortices immunostained for GFP and Ctip2.
- d. Quantification of fate changes in deep layer Ctip2<sup>+</sup> neurons, shows a slight increase of Ctip2<sup>+</sup>GFP<sup>+</sup> cells in total upon Cyr61 and Dab2 overexpression.
- e. Coronal sections of transfected cortices immunostained for GFP and Satb2.
- f. Quantification of distribution of GFP<sup>+</sup> transfected cells shows ApoE overexpression decreased Satb2<sup>+</sup>GFP<sup>+</sup> cells in CP and no changes in total. Dab2 overexpression increases the Satb2<sup>+</sup>GFP<sup>+</sup> cells in SVZ/IZ.

Summaries of the quantifications are in Table S6. Scale bars = 50  $\mu$ m. Data are shown as average  $\pm$  SEM, \*p= 0.05.

**Figure S8**

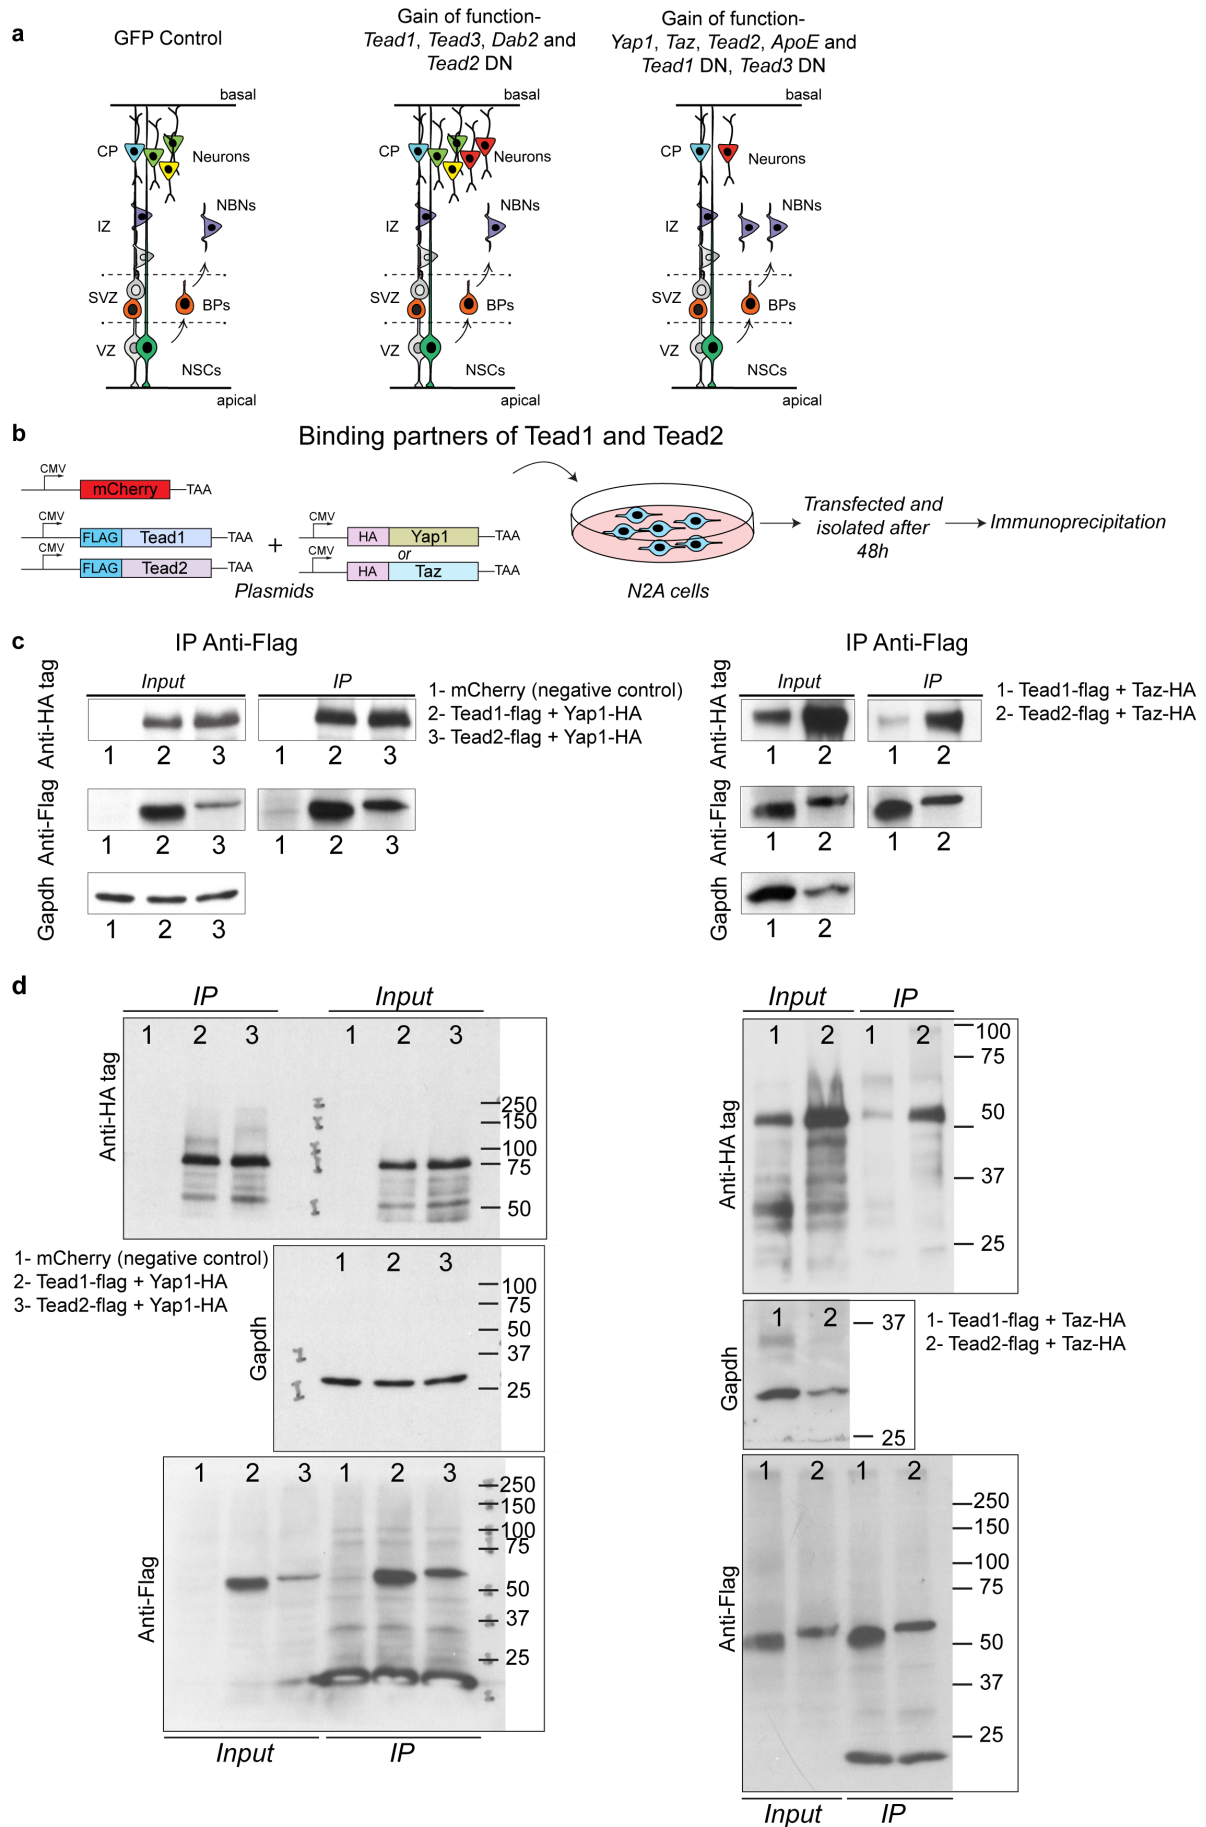

**Figure S8: Tead2 preferentially binds Yap1, in an overexpression paradigm.**

- a.** Summary of the phenotypic effects upon gain and loss of function of Hippo effectors and targets on neuronal migration in the CP.
- b.** N2A cells were transfected with flag tagged-Tead1 or Tead2 expression constructs; co-transfected with HA-tagged Yap1 expression construct. Cells were lysed after 48 hours and immunoprecipitation was performed using Anti-Flag antibody.
- c.** Western blot detection revealed that Yap1 preferentially binds Tead2 in N2A cells. Cropped images of the complete blots shown in **d**.
- d.** Images of the full-length blots including, molecular weight markers of the, of the cropped blots shown in **c**.

# Supplementary Data Tables

Table S1

a

|                  |          | Average $\pm$ SEM (GFP <sup>+</sup> cells) E13.5-E15.5, 48 hour chase |                         |                         |
|------------------|----------|-----------------------------------------------------------------------|-------------------------|-------------------------|
|                  |          | VZ                                                                    | SVZ/IZ                  | CP                      |
| GFP Control      | <i>n</i> | 28.11 $\pm$ 0.46<br>n=3                                               | 54.04 $\pm$ 1.00<br>n=3 | 17.85 $\pm$ 0.55<br>n=3 |
| Yap1             | <i>n</i> | 52.45 $\pm$ 3.07<br>n=3                                               | 49.16 $\pm$ 1.41<br>n=3 | 8.35 $\pm$ 1.69<br>n=3  |
| Taz              | <i>n</i> | 48.94 $\pm$ 4.65<br>n=3                                               | 53 $\pm$ 2.95<br>n=3    | 8.55 $\pm$ 1.31<br>n=3  |
| P-Values         |          |                                                                       |                         |                         |
| Yap1 v's Control |          | 0.0017 (**)                                                           | 0.0466 (*)              | 0.0102 (*)              |
| Taz v's Control  |          | 0.066 (*)                                                             | 0.7571 (ns)             | 0.0049 (**)             |

b

|                  |          | Average $\pm$ SEM (GFP <sup>+</sup> Pax6 <sup>+</sup> cells)/Total GFP <sup>+</sup> E13.5-E15.5, 48 hour chase |                         |                         |
|------------------|----------|----------------------------------------------------------------------------------------------------------------|-------------------------|-------------------------|
|                  |          | VZ                                                                                                             | SVZ/IZ                  | Total                   |
| GFP Control      | <i>n</i> | 25.71 $\pm$ 2.40<br>n=3                                                                                        | 4.90 $\pm$ 0.65<br>n=3  | 30.61 $\pm$ 2.87<br>n=3 |
| Yap1             | <i>n</i> | 41.22 $\pm$ 1.57<br>n=3                                                                                        | 11.24 $\pm$ 2.05<br>n=3 | 52.45 $\pm$ 3.10<br>n=3 |
| Taz              | <i>n</i> | 38.45 $\pm$ 4.19<br>n=3                                                                                        | 10.48 $\pm$ 0.90<br>n=3 | 48.94 $\pm$ 1.31<br>n=3 |
| P-Values         |          |                                                                                                                |                         |                         |
| Yap1 v's Control |          | 0.0066 (**)                                                                                                    | 0.0299 (*)              | 0.0069 (**)             |
| Taz v's Control  |          | 0.05 (*)                                                                                                       | 0.006 (**)              | 0.0283 (*)              |

c

|                  |          | Average $\pm$ SEM (Ki67 <sup>+</sup> GFP <sup>+</sup> cells)/Total GFP <sup>+</sup> E13.5-E15.5, 48 hour chase |                        |
|------------------|----------|----------------------------------------------------------------------------------------------------------------|------------------------|
|                  |          | VZ                                                                                                             | SVZ/IZ                 |
| GFP Control      | <i>n</i> | 92.71 $\pm$ 0.43<br>n=3                                                                                        | 43.7 $\pm$ 2.16<br>n=3 |
| Yap1             | <i>n</i> | 90.75 $\pm$ 3.73<br>n=3                                                                                        | 52.8 $\pm$ 1.75<br>n=3 |
| Taz              | <i>n</i> | 96.96 $\pm$ 1.206<br>n=3                                                                                       | 47.59 $\pm$ 2.8<br>n=3 |
| P-Values         |          |                                                                                                                |                        |
| Yap1 v's Control |          | 0.6293 (ns)                                                                                                    | 0.0308 (*)             |
| Taz v's Control  |          | 0.06 (ns)                                                                                                      | 0.322 (ns)             |

d

|                  |          | Average $\pm$ SEM (pHH3 <sup>+</sup> GFP <sup>+</sup> cells)/Total GFP <sup>+</sup> E13.5-E15.5, 48 hour chase |
|------------------|----------|----------------------------------------------------------------------------------------------------------------|
|                  |          | VZ                                                                                                             |
| GFP Control      | <i>n</i> | 42.01 $\pm$ 3.131<br>n=3                                                                                       |
| Yap1             | <i>n</i> | 40.83 $\pm$ 3.816<br>n=3                                                                                       |
| Taz              | <i>n</i> | 37.69 $\pm$ 1.404<br>n=3                                                                                       |
| P-Values         |          |                                                                                                                |
| Yap1 v's Control |          | 0.8231 (ns)                                                                                                    |
| Taz v's Control  |          | 0.2761 (ns)                                                                                                    |



e

|                             |          | <b>Average ± SEM (Cas3<sup>+</sup>GFP<sup>+</sup> cells)/Total GFP<sup>+</sup><br/>E13.5-E15.5, 48 hour chase</b> |  |
|-----------------------------|----------|-------------------------------------------------------------------------------------------------------------------|--|
|                             |          | SVZ/IZ                                                                                                            |  |
| GFP Control                 | <i>n</i> | 0.18 ± 0.11<br>n=3                                                                                                |  |
| Taz                         | <i>n</i> | 3.97 ± 1.37<br>n = 3                                                                                              |  |
| P-Values<br>Taz v's Control |          | 0.05 (*)                                                                                                          |  |

f

|                              |          | <b>Average ± SEM (GFP<sup>+</sup>Tbr2<sup>+</sup> cells)/Total GFP<sup>+</sup> in respective zones<br/>E13.5-E15.5, 48 hour chase</b> |                     |
|------------------------------|----------|---------------------------------------------------------------------------------------------------------------------------------------|---------------------|
|                              |          | VZ                                                                                                                                    | SVZ/IZ              |
| GFP Control                  | <i>n</i> | 20.52 ± 2.19<br>n=3                                                                                                                   | 40.64 ± 1.02<br>n=3 |
| Yap1                         | <i>n</i> | 21.29 ± 1.16<br>n=3                                                                                                                   | 42.46 ± 1.73<br>n=3 |
| Taz                          | <i>n</i> | 11.73 ± 1.01<br>n=3                                                                                                                   | 48.39 ± 3.57<br>n=3 |
| P-Values<br>Yap1 v's Control |          | 0.7714 (ns)                                                                                                                           | 0.4165 (ns)         |
| Taz v's Control              |          | 0.0219 (*)                                                                                                                            | 0.1052 (ns)         |

g

|                              |          | <b>Average ± SEM (GFP<sup>+</sup>Tbr1<sup>+</sup> cells)/Total GFP<sup>+</sup><br/>E13.5-E15.5, 48 hour chase</b> |                    |                     |
|------------------------------|----------|-------------------------------------------------------------------------------------------------------------------|--------------------|---------------------|
|                              |          | SVZ/IZ                                                                                                            | CP                 | Total               |
| GFP Control                  | <i>n</i> | 3.66 ± 0.08<br>n=3                                                                                                | 8.68 ± 0.07<br>n=3 | 12.34 ± 0.09<br>n=3 |
| Yap1                         | <i>n</i> | 2.88 ± 1.48<br>n=3                                                                                                | 5.20 ± 0.36<br>n=3 | 8.08 ± 1.70<br>n=3  |
| Taz                          | <i>n</i> | 3.44 ± 0.91<br>n=3                                                                                                | 4.83 ± 0.70<br>n=3 | 8.28 ± 0.26<br>n=3  |
| P-Values<br>Yap1 v's Control |          | 0.2402 (ns)                                                                                                       | 0.011 (**)         | 0.0838 (*)          |
| Taz v's Control              |          | 0.7319 (ns)                                                                                                       | 0.0099 (**)        | 0.0002 (***)        |

h

|                              |          | <b>Average ± SEM (GFP<sup>+</sup>Ctip2<sup>+</sup> cells)/Total GFP<sup>+</sup><br/>E13.5-E15.5, 48 hour chase</b> |                     |                     |                     |
|------------------------------|----------|--------------------------------------------------------------------------------------------------------------------|---------------------|---------------------|---------------------|
|                              |          | VZ                                                                                                                 | SVZ/IZ              | CP                  | Total               |
| GFP Control                  | <i>n</i> | 1.87 ± 1.06<br>n=3                                                                                                 | 41.39 ± 2.47<br>n=3 | 13.98 ± 1.82<br>n=3 | 57.24 ± 3.02<br>n=3 |
| Yap1                         | <i>n</i> | 7.58 ± 2.90<br>n=3                                                                                                 | 53.40 ± 3.2<br>n=3  | 6.46 ± 1.36<br>n=3  | 67.44 ± 4.23<br>n=3 |
| Taz                          | <i>n</i> | 6.96 ± 1.68<br>n=3                                                                                                 | 56.21 ± 5.42<br>n=3 | 5.06 ± 1.10<br>n=3  | 70.32 ± 5.27<br>n=3 |
| P-Values<br>Yap1 v's Control |          | 0.1082 (ns)                                                                                                        | 0.041 (*)           | 0.0289 (*)          | 0.1206 (ns)         |
| Taz v's Control              |          | 0.07 (ns)                                                                                                          | 0.05 (*)            | 0.0126 (*)          | 0.1046 (ns)         |

i

|                  |          | Average $\pm$ SEM (GFP <sup>+</sup> Satb2 <sup>+</sup> cells)/Total GFP <sup>+</sup><br>E13.5-E15.5, 48 hour chase |                         |                         |
|------------------|----------|--------------------------------------------------------------------------------------------------------------------|-------------------------|-------------------------|
|                  |          | SVZ/IZ                                                                                                             | CP                      | Total                   |
| GFP Control      | <i>n</i> | 28.87 $\pm$ 1.81<br>n=3                                                                                            | 15.89 $\pm$ 1.39<br>n=3 | 44.76 $\pm$ 2.78<br>n=3 |
| Yap1             | <i>n</i> | 40.59 $\pm$ 4.45<br>n=3                                                                                            | 12.00 $\pm$ 3.40<br>n=3 | 52.59 $\pm$ 1.05<br>n=3 |
| Taz              | <i>n</i> | 53.15 $\pm$ 3.89<br>n=3                                                                                            | 6.90 $\pm$ 0.31<br>n=3  | 60.05 $\pm$ 4.20<br>n=3 |
| P-Values         |          |                                                                                                                    |                         |                         |
| Yap1 v's Control |          | 0.06 (ns)                                                                                                          | 0.3423 (ns)             | 0.05 (*)                |
| Taz v's Control  |          | 0.0047 (**)                                                                                                        | 0.0021 (**)             | 0.04 (*)                |

**Table S1: Quantification of phenotypic changes upon overexpression of co-activators Yap1 and Taz (refers to Fig. 2).**

**a.** Table showing the distribution of transfected cells upon overexpression of Yap1 and Taz, compared to GFP control. **b.** Table showing quantification for Pax6<sup>+</sup>GFP<sup>+</sup> cells upon overexpression of Yap1 and Taz, compared to GFP control **c.** Table showing quantification for Ki67<sup>+</sup>GFP<sup>+</sup> cells upon overexpression of Yap1 and Taz, compared to GFP control. **d.** Table showing quantification for pHH3<sup>+</sup>GFP<sup>+</sup> cells upon overexpression of Yap1 and Taz, compared to GFP control. **e.** Table showing quantification for Cas3<sup>+</sup>GFP<sup>+</sup> cells upon overexpression of Yap1 and Taz, compared to GFP control. **f.** Table showing quantification for Tbr2<sup>+</sup>GFP<sup>+</sup> cells upon overexpression of Yap1 and Taz, compared to GFP control. **g.** Table showing quantification for Tbr1<sup>+</sup>GFP<sup>+</sup> cells upon overexpression of Yap1 and Taz, compared to GFP control. **h.** Table showing quantification for Ctip2<sup>+</sup>GFP<sup>+</sup> cells upon overexpression of Yap1 and Taz, compared to GFP control. **i.** Table showing quantification for Satb2<sup>+</sup>GFP<sup>+</sup> cells upon overexpression of Yap1 and Taz, compared to GFP control.

**Table S2****a**

| <b>Average ± SEM (GFP<sup>+</sup> cells)<br/>E13.5-E15.5, 48 hour chase</b> |              |              |                |
|-----------------------------------------------------------------------------|--------------|--------------|----------------|
|                                                                             | VZ           | SVZ/IZ       | CP             |
| GFP Control                                                                 | 28.11 ± 0.46 | 54.04 ± 0.99 | 17.85 ± 0.55   |
| <i>n</i>                                                                    | n=3          | n=3          | n=3            |
| Tead1                                                                       | 33.38 ± 1.87 | 43.99 ± 1.57 | 24.44 ± 1.33   |
| <i>n</i>                                                                    | n=3          | n=3          | n=3            |
| Tead2                                                                       | 35.34 ± 1.54 | 64.08 ± 1.70 | 0.59 ± 0.22    |
| <i>n</i>                                                                    | n=3          | n=3          | n=3            |
| Tead3                                                                       | 37.43 ± 1.62 | 36.33 ± 1.89 | 26.25 ± 0.75   |
| <i>n</i>                                                                    | n=3          | n=3          | n=3            |
| <b>P-Values</b>                                                             |              |              |                |
| Tead1 v's Control                                                           | 0.05 (*)     | 0.0057 (**)  | 0.009 (***)    |
| Tead2 v's Control                                                           | 0.3129 (ns)  | 0.0072 (**)  | <0.0001 (****) |
| Tead3 v's Control                                                           | 0.0048 (**)  | 0.0012 (**)  | 0.0008 (***)   |

**b**

| <b>Average ± SEM (GFP<sup>+</sup>Pax6<sup>+</sup> cells)/Total GFP<sup>+</sup><br/>E13.5-E15.5, 48 hour chase</b> |              |             |              |
|-------------------------------------------------------------------------------------------------------------------|--------------|-------------|--------------|
|                                                                                                                   | VZ           | SVZ/IZ      | Total        |
| GFP Control                                                                                                       | 25.71 ± 2.40 | 4.90 ± 0.65 | 30.61 ± 2.87 |
| <i>n</i>                                                                                                          | n=3          | n=3         | n=3          |
| Tead1                                                                                                             | 31.74 ± 1.21 | 3.20 ± 0.63 | 34.95 ± 1.48 |
| <i>n</i>                                                                                                          | n=3          | n=3         | n=3          |
| Tead2                                                                                                             | 32.21 ± 3.49 | 7.06 ± 1.98 | 39.26 ± 5.46 |
| <i>n</i>                                                                                                          | n=3          | n=3         | n=3          |
| Tead3                                                                                                             | 37.43 ± 1.62 | 3.73 ± 0.57 | 41.15 ± 1.99 |
| <i>n</i>                                                                                                          | n=3          | n=3         | n=3          |
| <b>P-Values</b>                                                                                                   |              |             |              |
| Tead1 v's Control                                                                                                 | 0.0927 (ns)  | 0.1396 (ns) | 0.2512 (ns)  |
| Tead2 v's Control                                                                                                 | 0.2016 (ns)  | 0.4088 (ns) | 0.2361 (ns)  |
| Tead3 v's Control                                                                                                 | 0.0173 (*)   | 0.2385 (ns) | 0.0412 (*)   |

**c**

| <b>Average ± SEM (GFP<sup>+</sup>Ki67<sup>+</sup> cells)/Total GFP<sup>+</sup><br/>E13.5-E15.5, 48 hour chase</b> |              |              |  |
|-------------------------------------------------------------------------------------------------------------------|--------------|--------------|--|
|                                                                                                                   | VZ           | SVZ/IZ       |  |
| GFP Control                                                                                                       | 92.71 ± 0.43 | 43.7 ± 2.16  |  |
| <i>n</i>                                                                                                          | n=3          | n=3          |  |
| Tead1                                                                                                             | 88.99 ± 5.17 | 52.8 ± 1.75  |  |
| <i>n</i>                                                                                                          | n=3          | n=3          |  |
| Tead2                                                                                                             | 94.94 ± 1.95 | 65.29 ± 4.89 |  |
| <i>n</i>                                                                                                          | n=3          | n=3          |  |
| Tead3                                                                                                             | 98.49 ± 1.27 | 75.48 ± 5.78 |  |
| <i>n</i>                                                                                                          | n=3          | n=3          |  |
| <b>P-Values</b>                                                                                                   |              |              |  |
| Tead1 v's Control                                                                                                 | 0.5135 (ns)  | 0.0308 (*)   |  |
| Tead2 v's Control                                                                                                 | 0.3271 (ns)  | 0.0156 (*)   |  |
| Tead3 v's Control                                                                                                 | 0.0126 (*)   | 0.0068 (**)  |  |

**d**

**Average  $\pm$  SEM (GFP<sup>+</sup>pHH3<sup>+</sup> cells)/Total GFP<sup>+</sup> E13.5-E15.5, 48 hour chase**

|                   |          | VZ                 |
|-------------------|----------|--------------------|
| GFP Control       |          | 42.01 $\pm$ 3.131  |
|                   | <i>n</i> | n=3                |
| Tead1             |          | 39.87 $\pm$ 2.112  |
|                   | <i>n</i> | n=3                |
| Tead2             |          | 36.02 $\pm$ 0.5645 |
|                   | <i>n</i> | n=3                |
| Tead3             |          | 60.03 $\pm$ 4.433  |
|                   | <i>n</i> | n=3                |
| P-Values          |          |                    |
| Tead1 v's Control |          | 0.6015 (ns)        |
| Tead2 v's Control |          | 0.133 (ns)         |
| Tead3 v's Control |          | 0.0294 (*)         |

**e**

**Average  $\pm$  SEM (GFP<sup>+</sup>Tbr2<sup>+</sup> cells)/Total GFP<sup>+</sup> in respective zones E13.5-E15.5, 48 hour chase**

|                   |          | VZ                 | SVZ/IZ            |
|-------------------|----------|--------------------|-------------------|
| GFP Control       |          | 20.52 $\pm$ 2.188  | 40.64 $\pm$ 1.025 |
|                   | <i>n</i> | n=3                | n=3               |
| Tead1             |          | 21.47 $\pm$ 0.6866 | 38.61 $\pm$ 2.317 |
|                   | <i>n</i> | n=3                | n=3               |
| Tead2             |          | 22.13 $\pm$ 2.39   | 44.46 $\pm$ 2.01  |
|                   | <i>n</i> | n=3                | n=3               |
| Tead3             |          | 24.61 $\pm$ 4.768  | 42.03 $\pm$ 3.251 |
|                   | <i>n</i> | n=3                | n=3               |
| P-Values          |          |                    |                   |
| Tead1 v's Control |          | 0.6983 (ns)        | 0.4678 (ns)       |
| Tead2 v's Control |          | 0.6445 (ns)        | 0.166 (ns)        |
| Tead3 v's Control |          | 0.4784 (ns)        | 0.7043 (ns)       |

**f**

**Average  $\pm$  SEM (GFP<sup>+</sup>Tbr1<sup>+</sup> cells)/Total GFP<sup>+</sup> E13.5-E15.5, 48 hour chase**

|                   |          | VZ               | SVZ/IZ           | Total            |
|-------------------|----------|------------------|------------------|------------------|
| GFP Control       |          | 3.66 $\pm$ 0.08  | 8.68 $\pm$ 0.07  | 12.34 $\pm$ 0.09 |
|                   | <i>n</i> | n=3              | n=3              | n=3              |
| Tead1             |          | 25.71 $\pm$ 8.39 | 17.53 $\pm$ 0.88 | 43.24 $\pm$ 8.36 |
|                   | <i>n</i> | n=3              | n=3              | n=3              |
| Tead2             |          | 0.00 $\pm$ 0.00  | 1.04 $\pm$ 0.52  | 1.57 $\pm$ 0.02  |
|                   | <i>n</i> | n=3              | n=3              | n=3              |
| Tead3             |          | 10.22 $\pm$ 1.96 | 17.93 $\pm$ 0.20 | 28.14 $\pm$ 2.10 |
|                   | <i>n</i> | n=3              | n=3              | n=3              |
| P-Values          |          |                  |                  |                  |
| Tead1 v's Control |          | 0.0382 (*)       | 0.0003 (***)     | 0.014 (*)        |
| Tead2 v's Control |          | <0.0001 (****)   | <0.0001 (****)   | <0.0001 (****)   |
| Tead3 v's Control |          | 0.0145 (*)       | <0.0001 (****)   | 0.001 (***)      |

**g**

**Average  $\pm$  SEM (GFP<sup>+</sup>Ctip2<sup>+</sup> cells)/Total GFP<sup>+</sup>  
E13.5-E15.5, 48 hour chase**

|                   |          | VZ                     | SVZ/IZ                   | CP                      | Total                   |
|-------------------|----------|------------------------|--------------------------|-------------------------|-------------------------|
| GFP Control       | <i>n</i> | 1.87 $\pm$ 1.06<br>n=3 | 41.39 $\pm$ 2.47<br>n=3  | 13.98 $\pm$ 1.82<br>n=3 | 57.24 $\pm$ 3.02<br>n=3 |
| Tead1             | <i>n</i> | 1.18 $\pm$ 1.18<br>n=3 | 27.91 $\pm$ 13.99<br>n=3 | 20.96 $\pm$ 0.06<br>n=3 | 64.59 $\pm$ 3.4<br>n=3  |
| Tead2             | <i>n</i> | 6.44 $\pm$ 1.42<br>n=3 | 56.21 $\pm$ 5.42<br>n=3  | 1.758 $\pm$ 0.26<br>n=3 | 64.40 $\pm$ 4.23<br>n=3 |
| Tead3             | <i>n</i> | 0.44 $\pm$ 0.44<br>n=3 | 35.33 $\pm$ 0.95<br>n=3  | 18.98 $\pm$ 0.47<br>n=3 | 54.75 $\pm$ 1.03<br>n=3 |
| P-Values          |          |                        |                          |                         |                         |
| Tead1 v's Control |          | 0.6279 (ns)            | 0.7329 (ns)              | 0.0255 (*)              | 0.08 (ns)               |
| Tead2 v's Control |          | 0.07 (ns)              | 0.06 (ns)                | 0.001 (***)             | 0.2402 (ns)             |
| Tead3 v's Control |          | 0.3258 (ns)            | 0.08 (ns)                | 0.06 (ns)               | 0.479 (ns)              |

**h**

**Average  $\pm$  SEM (GFP<sup>+</sup>Satb2<sup>+</sup> cells)/Total GFP<sup>+</sup>  
E13.5-E15.5, 48 hour chase**

|                   |          | SVZ/IZ                  | CP                      | Total                   |
|-------------------|----------|-------------------------|-------------------------|-------------------------|
| GFP Control       | <i>n</i> | 28.87 $\pm$ 1.81<br>n=3 | 15.89 $\pm$ 1.39<br>n=3 | 44.76 $\pm$ 2.78<br>n=3 |
| Tead1             | <i>n</i> | 37.24 $\pm$ 2.51<br>n=3 | 15.44 $\pm$ 0.18<br>n=3 | 52.68 $\pm$ 2.68<br>n=3 |
| Tead2             | <i>n</i> | 45.79 $\pm$ 2.31<br>n=3 | 2.19 $\pm$ 0.56<br>n=3  | 47.97 $\pm$ 2.24<br>n=3 |
| Tead3             | <i>n</i> | 35.53 $\pm$ 1.50<br>n=3 | 16.9 $\pm$ 3.86<br>n=3  | 52.43 $\pm$ 2.40<br>n=3 |
| P-Values          |          |                         |                         |                         |
| Tead1 v's Control |          | 0.05 (*)                | 0.7957 (ns)             | 0.1097 (ns)             |
| Tead2 v's Control |          | 0.0045 (**)             | 0.0008 (***)            | 0.4181 (ns)             |
| Tead3 v's Control |          | 0.047 (*)               | 0.8589 (ns)             | 0.1051 (ns)             |

**Table S2: Quantification of phenotypic changes upon overexpression of TFs Tead1, Tead2 and Tead3 (refers to Fig. 3).**

**a.** Table showing the distribution of transfected cells upon overexpression of Tead1, Tead2 and Tead3 compared to GFP control. **b.** Table showing quantification for Pax6<sup>+</sup>GFP<sup>+</sup> cells upon overexpression of Tead1, Tead2 and Tead3, compared to GFP control. **c.** Table showing quantification for Ki67<sup>+</sup>GFP<sup>+</sup> cells upon overexpression of Tead1, Tead2 and Tead3, compared to GFP control. **d.** Table showing quantification for pHH3<sup>+</sup>GFP<sup>+</sup> cells upon overexpression of Tead1, Tead2 and Tead3, compared to GFP control. **e.** Table showing quantification for Tbr2<sup>+</sup>GFP<sup>+</sup> cells upon overexpression of Tead1, Tead2 and Tead3, compared to GFP control. **f.** Table showing quantification for Tbr1<sup>+</sup>GFP<sup>+</sup> cells upon overexpression of Tead1, Tead2 and Tead3, compared to GFP control. **g.** Table showing quantification for Ctip2<sup>+</sup>GFP<sup>+</sup> cells upon overexpression of Tead1, Tead2 and Tead3, compared to GFP control. **h.** Table showing quantification for Satb2<sup>+</sup>GFP<sup>+</sup> cells upon overexpression of Tead1, Tead2 and Tead3, compared to GFP control.

**Table S3****a**

|                      |          | <b>Average ± SEM (GFP<sup>+</sup> cells)<br/>E13.5-E15.5, 48 hour chase</b> |                     |                     |
|----------------------|----------|-----------------------------------------------------------------------------|---------------------|---------------------|
|                      |          | VZ                                                                          | SVZ/IZ              | CP                  |
| GFP Control          | <i>n</i> | 28.11 ± 0.46<br>n=3                                                         | 54.04 ± 0.99<br>n=3 | 17.85 ± 0.55<br>n=3 |
| Tead1 DN             | <i>n</i> | 38.59 ± 1.29<br>n=3                                                         | 57.53 ± 1.93<br>n=3 | 3.89 ± 0.88<br>n=3  |
| Tead2 DN             | <i>n</i> | 32.36 ± 0.90<br>n=3                                                         | 38.46 ± 1.07<br>n=3 | 29.19 ± 1.68<br>n=3 |
| Tead3 DN             | <i>n</i> | 36.59 ± 3.14<br>n=3                                                         | 54.58 ± 3.10<br>n=3 | 8.832 ± 1.07<br>n=3 |
| P-Values             |          |                                                                             |                     |                     |
| Tead1 DN v's Control |          | 0.0014 (**)                                                                 | 0.1833 (ns)         | 0.0006 (***)        |
| Tead2 DN v's Control |          | 0.013 (*)                                                                   | 0.0004 (***)        | 0.0024 (**)         |
| Tead3 DN v's Control |          | 0.05 (*)                                                                    | 0.8746 (ns)         | 0.0028 (**)         |

**b**

|                      |          | <b>Average ± SEM (GFP<sup>+</sup>Pax6<sup>+</sup> cells)/Total GFP<sup>+</sup><br/>E13.5-E15.5, 48 hour chase</b> |                    |                     |
|----------------------|----------|-------------------------------------------------------------------------------------------------------------------|--------------------|---------------------|
|                      |          | VZ                                                                                                                | SVZ/IZ             | Total               |
| GFP Control          | <i>n</i> | 25.71 ± 2.40<br>n=3                                                                                               | 4.90 ± 0.65<br>n=3 | 30.61 ± 2.87<br>n=3 |
| Tead1 DN             | <i>n</i> | 32.36 ± 0.90<br>n=3                                                                                               | 6.30 ± 0.79<br>n=3 | 39.29 ± 1.23<br>n=3 |
| Tead2 DN             | <i>n</i> | 38.58 ± 1.29<br>n=3                                                                                               | 8.42 ± 1.05<br>n=3 | 47.00 ± 2.08<br>n=3 |
| Tead3 DN             | <i>n</i> | 36.59 ± 3.14<br>n=3                                                                                               | 5.06 ± 0.56<br>n=3 | 41.65 ± 3.10<br>n=3 |
| P-Values             |          |                                                                                                                   |                    |                     |
| Tead1 DN v's Control |          | 0.06 (*)                                                                                                          | 0.1637 (ns)        | 0.05 (*)            |
| Tead2 DN v's Control |          | 0.0107 (*)                                                                                                        | 0.0413 (*)         | 0.0108 (*)          |
| Tead3 DN v's Control |          | 0.05 (*)                                                                                                          | 0.8484 (ns)        | 0.06 (*)            |

**c**

|                      |          | <b>Average ± SEM (GFP<sup>+</sup>Tbr1<sup>+</sup> cells)/Total GFP<sup>+</sup><br/>E13.5-E15.5, 48 hour chase</b> |                     |                     |
|----------------------|----------|-------------------------------------------------------------------------------------------------------------------|---------------------|---------------------|
|                      |          | SVZ/IZ+                                                                                                           | CP+                 | Total+              |
| GFP Control          | <i>n</i> | 3.66 ± 0.08<br>n=3                                                                                                | 8.68 ± 0.06<br>n=3  | 12.34 ± 0.09<br>n=3 |
| Tead1 DN             | <i>n</i> | 3.21 ± 1.01<br>n=3                                                                                                | 2.22 ± 0.19<br>n=3  | 5.42 ± 1.02<br>n=3  |
| Tead2 DN             | <i>n</i> | 1.04 ± 0.63<br>n=3                                                                                                | 22.44 ± 1.40<br>n=3 | 23.48 ± 2.00<br>n=3 |
| Tead3 DN             | <i>n</i> | 8.53 ± 0.64<br>n=3                                                                                                | 5.20 ± 0.27<br>n=3  | 13.73 ± 0.38<br>n=3 |
| P-Values             |          |                                                                                                                   |                     |                     |
| Tead1 DN v's Control |          | 0.6025 (ns)                                                                                                       | <0.0001 (****)      | 0.006 (**)          |
| Tead2 DN v's Control |          | 0.041 (*)                                                                                                         | 0.0003 (***)        | 0.0036 (**)         |
| Tead3 DN v's Control |          | 0.0009 (***)                                                                                                      | 0.0004 (***)        | 0.224 (ns)          |

d

| Average $\pm$ SEM (GFP <sup>+</sup> Ctip2 <sup>+</sup> cells)/Total GFP <sup>+</sup><br>E13.5-E15.5, 48 hour chase |          |                        |                         |                         |                         |
|--------------------------------------------------------------------------------------------------------------------|----------|------------------------|-------------------------|-------------------------|-------------------------|
|                                                                                                                    |          | VZ                     | SVZ/IZ                  | CP                      | Total                   |
| GFP Control                                                                                                        | <i>n</i> | 1.87 $\pm$ 1.06<br>n=3 | 41.39 $\pm$ 2.47<br>n=3 | 13.98 $\pm$ 1.82<br>n=3 | 57.24 $\pm$ 3.02<br>n=3 |
| Tead1 DN                                                                                                           | <i>n</i> | 3.45 $\pm$ 0.69<br>n=3 | 54.43 $\pm$ 5.15<br>n=3 | 2.57 $\pm$ 0.89<br>n=3  | 59.59 $\pm$ 4.99<br>n=3 |
| Tead2 DN                                                                                                           | <i>n</i> | 1.00 $\pm$ 0.51<br>n=3 | 33.09 $\pm$ 2.25<br>n=3 | 20.74 $\pm$ 0.85<br>n=3 | 57.30 $\pm$ 2.66<br>n=3 |
| Tead3 DN                                                                                                           | <i>n</i> | 2.84 $\pm$ 1.03<br>n=3 | 50.45 $\pm$ 6.00<br>n=3 | 5.22 $\pm$ 1.68<br>n=3  | 60.02 $\pm$ 5.14<br>n=3 |
| P-Values                                                                                                           |          |                        |                         |                         |                         |
| Tead1 DN v's Control                                                                                               |          | 0.2817 (ns)            | 0.08 (ns)               | 0.0054 (**)             | 0.7061 (ns)             |
| Tead2 DN v's Control                                                                                               |          | 0.6334 (ns)            | 0.06 (ns)               | 0.035 (*)               | 0.9913 (ns)             |
| Tead3 DN v's Control                                                                                               |          | 0.5067 (ns)            | 0.2355 (ns)             | 0.0285 (*)              | 0.6585 (ns)             |

e

| Average $\pm$ SEM (GFP <sup>+</sup> Satb2 <sup>+</sup> cells)/Total GFP <sup>+</sup><br>E13.5-E15.5, 48 hour chase |          |                         |                         |                         |
|--------------------------------------------------------------------------------------------------------------------|----------|-------------------------|-------------------------|-------------------------|
|                                                                                                                    |          | SVZ/IZ                  | CP                      | Total                   |
| GFP Control                                                                                                        | <i>n</i> | 28.87 $\pm$ 1.81<br>n=3 | 15.89 $\pm$ 1.39<br>n=3 | 44.76 $\pm$ 2.78<br>n=3 |
| Tead1 DN                                                                                                           | <i>n</i> | 49.14 $\pm$ 1.31<br>n=3 | 2.51 $\pm$ 1.56<br>n=3  | 51.65 $\pm$ 1.52<br>n=3 |
| Tead2 DN                                                                                                           | <i>n</i> | 21.99 $\pm$ 2.32<br>n=3 | 16.75 $\pm$ 1.25<br>n=3 | 38.74 $\pm$ 1.55<br>n=3 |
| Tead3 DN                                                                                                           | <i>n</i> | 37.68 $\pm$ 2.87<br>n=3 | 5.55 $\pm$ 1.04<br>n=3  | 43.24 $\pm$ 3.90<br>n=3 |
| P-Values                                                                                                           |          |                         |                         |                         |
| Tead1 DN v's Control                                                                                               |          | 0.0066 (**)             | 0.0299 (*)              | 0.095 (ns)              |
| Tead2 DN v's Control                                                                                               |          | 0.08 (ns)               | 0.6678 (ns)             | 0.1312 (ns)             |
| Tead3 DN v's Control                                                                                               |          | 0.05 (*)                | 0.04 (**)               | 0.7638 (ns)             |

**Table S3: Quantification of phenotypic changes upon expression of dominant negative forms of TFs Tead1, Tead2 and Tead3 (refers to Fig. 4).**

**a.** Table showing the distribution of transfected cells upon expression of dominant negative forms of Tead1, Tead2 and Tead3, compared to GFP control. **b.** Table showing quantification for Pax6<sup>+</sup>GFP<sup>+</sup> cells upon expression of dominant negative forms of Tead1, Tead2 and Tead3, compared to GFP control. **c.** Table showing quantification for Tbr1<sup>+</sup>GFP<sup>+</sup> cells upon expression of dominant negative forms of Tead1, Tead2 and Tead3, compared to GFP control. **d.** Table showing quantification for Ctip2<sup>+</sup>GFP<sup>+</sup> cells upon expression of dominant negative forms of Tead1, Tead2 and Tead3, compared to GFP control. **e.** Table showing quantification for Satb2<sup>+</sup>GFP<sup>+</sup> cells upon expression of dominant negative forms of Tead1, Tead2 and Tead3, compared to GFP control.

**Table S4****a**

|                        |          | <b>Average ± SEM (GFP<sup>+</sup> cells)<br/>E13.5-E15.5, 48 hour chase</b> |                      |                     |
|------------------------|----------|-----------------------------------------------------------------------------|----------------------|---------------------|
|                        |          | VZ                                                                          | SVZ/IZ               | CP                  |
| GFP Control            | <i>n</i> | 28.11 ± 0.46<br>n=3                                                         | 54.04 ± 0.99<br>n=3  | 17.85 ± 0.55<br>n=3 |
| Tead1 VP16             | <i>n</i> | 46.8 ± 4.55<br>n=3                                                          | 45.36 ± 4.66<br>n=3  | 7.72 ± 0.08<br>n=3  |
| Tead2 VP16             | <i>n</i> | 48.34 ± 17.68<br>n=3                                                        | 33.63 ± 13.64<br>n=3 | 1.89 ± 0.61<br>n=3  |
| P-Values               |          |                                                                             |                      |                     |
| Tead1 VP16 v's Control |          | 0.0136 (*)                                                                  | 0.1426 (*)           | <0.0001 (****)      |
| Tead2 VP16 v's Control |          | 0.32 (ns)                                                                   | 0.2091 (ns)          | 0.0002 (***)        |

**b**

|                        |          | <b>Average ± SEM (GFP<sup>+</sup>Pax6<sup>+</sup> cells)/Total GFP<sup>+</sup><br/>E13.5-E15.5, 48 hour chase</b> |                      |                      |
|------------------------|----------|-------------------------------------------------------------------------------------------------------------------|----------------------|----------------------|
|                        |          | VZ                                                                                                                | SVZ/IZ               | Total                |
| GFP Control            | <i>n</i> | 25.71 ± 2.40<br>n=3                                                                                               | 4.90 ± 0.65<br>n=3   | 30.61 ± 2.87<br>n=3  |
| Tead1 VP16             | <i>n</i> | 46.92 ± 4.59<br>n=3                                                                                               | 4.19 ± 1.03<br>n=3   | 51.12 ± 3.60<br>n=3  |
| Tead2 VP16             | <i>n</i> | 48.22 ± 17.76<br>n=3                                                                                              | 29.13 ± 14.14<br>n=3 | 77.35 ± 15.58<br>n=3 |
| P-Values               |          |                                                                                                                   |                      |                      |
| Tead1 VP16 v's Control |          | 0.0144 (*)                                                                                                        | 0.5473 (ns)          | 0.0115 (*)           |
| Tead2 VP16 v's Control |          | 0.278 (ns)                                                                                                        | 0.1153 (ns)          | 0.0476 (*)           |

**Table S4: Quantification of phenotypic changes upon expression of transactive forms of TFs Tead1 and Tead2 (refers to Fig. 5).**

**a.** Table showing the distribution of transfected cells upon expression of transactive forms of Tead1 and Tead2, compared to GFP control. **b.** Table showing quantification for Pax6<sup>+</sup>GFP<sup>+</sup> cells upon expression of transactive forms of Tead1 and Tead2, compared to GFP control.

**Table S5****a**

| <b>Chromatin Immunoprecipitation</b> | <b>Negative</b>     | <b>Tead1-flag</b>  | <b>Tead2-flag</b>  |
|--------------------------------------|---------------------|--------------------|--------------------|
| <i>ApoE</i>                          | 0.0002373 ± 0       | 0.002739 ± 0.00019 | 0.004509 ± 0.00029 |
| P-Values (t-test)                    |                     | 0.0063             | 0.0048             |
| <i>Dab2</i>                          | 0.0007925 ± 4.35e-8 | 0.00274 ± 4.4e-7   | 0.00335 ± 0.001357 |
| P-Values (t-test)                    |                     | <0.0001            | 0.2002             |
| <i>Cyr61</i>                         | 0.001553 ± 2.55e-8  | 0.003421 ± 2.65e-7 | 0.00335 ± 0.001357 |
| P-Values (t-test)                    |                     | <0.0001            | 0.08               |
|                                      | <i>n</i>            | <i>n</i>           | <i>n</i>           |
|                                      | n=2                 | n=2                | n=2                |



**b**

| Gene              | Relative expression $\pm$ SEM (NSCs) |                  |                  |
|-------------------|--------------------------------------|------------------|------------------|
|                   | GFP Control                          | Tead1            | Tead2            |
| <i>ApoE</i>       | 1.11 $\pm$ 0.11                      | 16.67 $\pm$ 0.70 | 31.43 $\pm$ 3.31 |
| P-Values (t-test) |                                      | <0.0001          | <0.0001          |
| <i>n</i>          | n=4                                  | n=3              | n=4              |
| <i>Dab2</i>       | 0.65 $\pm$ 0.16                      | 26.80 $\pm$ 9.85 | 38.95 $\pm$ 4.80 |
| P-Values (t-test) |                                      | 0.0378           | 0.0002           |
| <i>n</i>          | n=4                                  | n=3              | n=4              |
| <i>Cyr61</i>      | 0.989 $\pm$ 0.12                     | 5.99 $\pm$ 1.11  | 5.66 $\pm$ 1.14  |
| P-Values (t-test) |                                      | 0.0001           | <0.0001          |
| <i>n</i>          | n=4                                  | n=3              | n=4              |
| <i>Dtna</i>       | 1 $\pm$ 0.18                         | 0.81 $\pm$ 0.03  | 1.01 $\pm$ 0.17  |
| P-Values (t-test) |                                      | 0.2332           | 0.9455           |
| <i>n</i>          | n=3                                  | n=5              | n=3              |
| <i>Reln</i>       | 1 $\pm$ 0.14                         | 0.80 $\pm$ 0.13  | 1.8 $\pm$ 0.9    |
| P-Values (t-test) |                                      | 0.3777           | 0.4939           |
| <i>n</i>          | n = 3                                | n = 5            | n = 4            |
| <i>Dab2ip</i>     | 1 $\pm$ 0.14                         | 1.17 $\pm$ 0.15  | 0.77 $\pm$ 0.10  |
| P-Values (t-test) |                                      | 0.4339           | 0.2133           |
| <i>n</i>          | n = 5                                | n = 7            | n = 5            |
| <i>Ntn4</i>       | 1 $\pm$ 0.23                         | 0.38 $\pm$ 0.024 | 0.666 $\pm$ 0.16 |
| P-Values (t-test) |                                      | 0.128            | 0.2978           |
| <i>n</i>          | n=3                                  | n=2              | n=3              |
| <i>ApoER2</i>     | 1 $\pm$ 0.35                         | 0.88 $\pm$ 0.10  | 1.76 $\pm$ 0.52  |
| P-Values (t-test) |                                      | 0.7007           | 0.3163           |
| <i>n</i>          | n=3                                  | n=5              | n=4              |
| <i>Dab1</i>       | 1 $\pm$ 0.22                         | 1.51 $\pm$ 0.14  | 1.18 $\pm$ 0.11  |
| P-Values (t-test) |                                      | 0.0821           | 0.4571           |
| <i>n</i>          | n=3                                  | n=5              | n=4              |
| <i>Lis1</i>       | 1 $\pm$ 0.35                         | 1.41 $\pm$ 0.18  | 0.87 $\pm$ 0.07  |
| P-Values (t-test) |                                      | 0.2891           | 0.681            |
| <i>n</i>          | n=3                                  | n=5              | n=4              |
| <i>Nde1</i>       | 1 $\pm$ 0.33                         | 0.74 $\pm$ 0.10  | 0.62 $\pm$ 0.08  |
| P-Values (t-test) |                                      | 0.3788           | 0.249            |
| <i>n</i>          | n=3                                  | n=5              | n=4              |
| <i>Yap1</i>       | 1 $\pm$ 0.19                         | 1.043 $\pm$ 0.06 | 0.99 $\pm$ 0.082 |
| P-Values (t-test) |                                      | 0.7952           | 0.9787           |
| <i>n</i>          | n=3                                  | n=5              | n=4              |

**Table S5: Quantification of CHIP and relative expression for predicted Tead target genes (refers to Fig. 6).**

**a.** Table summarizes CHIP results for flag tagged-Tead1 and flag tagged-Tead2 compared to negative control. **b.** Table summarizes relative expression of predicted target genes upon overexpression of Tead1 and Tead2 *in vivo*, compared to a GFP control.

**Table S6****a**

|                   |          | <b>Average ± SEM (GFP<sup>+</sup> cells)<br/>E13.5-E15.5, 48 hour chase</b> |                     |                     |
|-------------------|----------|-----------------------------------------------------------------------------|---------------------|---------------------|
|                   |          | VZ                                                                          | SVZ/IZ              | CP                  |
| GFP Control       | <i>n</i> | 28.11 ± 0.46<br>n=3                                                         | 54.04 ± 0.99<br>n=3 | 17.85 ± 0.55<br>n=3 |
| ApoE              | <i>n</i> | 33.85 ± 2.37<br>n=3                                                         | 53.83 ± 1.40<br>n=3 | 12.32 ± 0.99<br>n=3 |
| Dab2              | <i>n</i> | 28.35 ± 0.88<br>n=3                                                         | 51.16 ± 0.91<br>n=3 | 20.49 ± 0.42<br>n=3 |
| Cyr61             | <i>n</i> | 31.44 ± 2.19<br>n=3                                                         | 50.08 ± 0.33<br>n=3 | 16.69 ± 0.73<br>n=3 |
| <b>P-Values</b>   |          |                                                                             |                     |                     |
| ApoE v's Control  |          | 0.07 (ns)                                                                   | 0.0906 (ns)         | 0.0101 (*)          |
| Dab2 v's Control  |          | 0.82 (ns)                                                                   | 0.0986 (ns)         | 0.0194 (*)          |
| Cyr61 v's Control |          | 0.214 (ns)                                                                  | 0.0189 (*)          | 0.273 (ns)          |

**b**

|                   |          | <b>Average ± SEM (GFP<sup>+</sup>Pax6<sup>+</sup> cells)/Total GFP<sup>+</sup><br/>E13.5-E15.5, 48 hour chase</b> |                    |                     |
|-------------------|----------|-------------------------------------------------------------------------------------------------------------------|--------------------|---------------------|
|                   |          | VZ                                                                                                                | SVZ/IZ             | Total               |
| GFP Control       | <i>n</i> | 25.71 ± 2.40<br>n=3                                                                                               | 4.90 ± 0.65<br>n=3 | 30.61 ± 2.87<br>n=3 |
| ApoE              | <i>n</i> | 33.85 ± 2.37<br>n=3                                                                                               | 5.99 ± 1.19<br>n=3 | 39.84 ± 1.18<br>n=3 |
| Dab2              | <i>n</i> | 28.35 ± 0.88<br>n=3                                                                                               | 7.04 ± 1.19<br>n=3 | 35.39 ± 0.60<br>n=3 |
| Cyr61             | <i>n</i> | 31.44 ± 2.19<br>n=3                                                                                               | 5.55 ± 0.79<br>n=3 | 36.99 ± 1.45<br>n=3 |
| <b>P-Values</b>   |          |                                                                                                                   |                    |                     |
| ApoE v's Control  |          | 0.07 (ns)                                                                                                         | 0.5027 (ns)        | 0.0441 (*)          |
| Dab2 v's Control  |          | 0.3585 (ns)                                                                                                       | 0.195 (ns)         | 0.1817 (ns)         |
| Cyr61 v's Control |          | 0.1563 (ns)                                                                                                       | 0.5511 (ns)        | 0.1216 (ns)         |

**c**

|                   |          | <b>Average ± SEM (GFP<sup>+</sup>Tbr1<sup>+</sup> cells)/Total GFP<sup>+</sup><br/>E13.5-E15.5, 48 hour chase</b> |                     |                     |
|-------------------|----------|-------------------------------------------------------------------------------------------------------------------|---------------------|---------------------|
|                   |          | SVZ/IZ                                                                                                            | CP                  | Total               |
| GFP Control       | <i>n</i> | 3.66 ± 0.08<br>n=3                                                                                                | 8.67 ± 0.07<br>n=3  | 12.34 ± 0.09<br>n=3 |
| ApoE              | <i>n</i> | 5.49 ± 0.80<br>n=3                                                                                                | 10.53 ± 2.33<br>n=3 | 16.02 ± 3.00<br>n=3 |
| Dab2              | <i>n</i> | 6.18 ± 1.13<br>n=3                                                                                                | 16.66 ± 1.35<br>n=3 | 22.83 ± 2.01<br>n=3 |
| Cyr61             | <i>n</i> | 6.00 ± 0.96<br>n=3                                                                                                | 15.91 ± 0.14<br>n=3 | 21.9 ± 0.91<br>n=3  |
| <b>P-Values</b>   |          |                                                                                                                   |                     |                     |
| ApoE v's Control  |          | 0.08 (ns)                                                                                                         | 0.4972 (ns)         | 0.2927 (ns)         |
| Dab2 v's Control  |          | 0.08 (ns)                                                                                                         | 0.0026 (**)         | 0.0043 (**)         |
| Cyr61 v's Control |          | 0.06 (ns)                                                                                                         | <0.0001 (****)      | 0.0003 (***)        |

d

| Average ± SEM (GFP <sup>+</sup> Ctip2 <sup>+</sup> cells)/Total GFP <sup>+</sup><br>E13.5-E15.5, 48 hour chase |          |                    |                     |                     |                     |
|----------------------------------------------------------------------------------------------------------------|----------|--------------------|---------------------|---------------------|---------------------|
|                                                                                                                |          | VZ                 | SVZ/IZ              | CP                  | Total               |
| GFP Control                                                                                                    | <i>n</i> | 1.87 ± 1.06<br>n=3 | 41.39 ± 2.47<br>n=3 | 13.98 ± 1.82<br>n=3 | 57.24 ± 3.02<br>n=3 |
| ApoE                                                                                                           | <i>n</i> | 2.74 ± 0.37<br>n=3 | 50.29 ± 1.58<br>n=3 | 11.28 ± 1.83<br>n=3 | 64.31 ± 0.12<br>n=3 |
| Dab2                                                                                                           | <i>n</i> | 6.01 ± 1.51<br>n=3 | 48.51 ± 1.35<br>n=3 | 16.49 ± 0.55<br>n=3 | 71.01 ± 2.58<br>n=3 |
| Cyr61                                                                                                          | <i>n</i> | 2.78 ± 0.77<br>n=3 | 52.22 ± 1.66<br>n=3 | 13.66 ± 1.67<br>n=3 | 68.66 ± 0.37<br>n=3 |
| P-Values                                                                                                       |          |                    |                     |                     |                     |
| ApoE v's Control                                                                                               |          | 0.5394 (ns)        | 0.03 (*)            | 0.03 (*)            | 0.078 (ns)          |
| Dab2 v's Control                                                                                               |          | 0.09 (ns)          | 0.06 (ns)           | 0.2646 (ns)         | 0.0262 (*)          |
| Cyr61 v's Control                                                                                              |          | 0.4552 (ns)        | 0.022 (*)           | 0.9106 (ns)         | 0.0189 (*)          |

e

| Average ± SEM (GFP <sup>+</sup> Satb2 <sup>+</sup> cells)/Total GFP <sup>+</sup><br>E13.5-E15.5, 48 hour chase |          |                     |                     |                     |
|----------------------------------------------------------------------------------------------------------------|----------|---------------------|---------------------|---------------------|
|                                                                                                                |          | SVZ/IZ              | CP                  | Total               |
| GFP Control                                                                                                    | <i>n</i> | 28.87 ± 1.81<br>n=3 | 15.89 ± 1.39<br>n=3 | 44.76 ± 2.78<br>n=3 |
| ApoE                                                                                                           | <i>n</i> | 32.79 ± 6.51<br>n=3 | 7.90 ± 1.58<br>n=3  | 40.68 ± 7.70<br>n=3 |
| Dab2                                                                                                           | <i>n</i> | 35.09 ± 0.88<br>n=3 | 11.2 ± 1.44<br>n=3  | 46.29 ± 2.13<br>n=3 |
| Cyr61                                                                                                          | <i>n</i> | 33.27 ± 1.76<br>n=3 | 12.87 ± 2.00<br>n=3 | 46.13 ± 0.48<br>n=3 |
| P-Values                                                                                                       |          |                     |                     |                     |
| ApoE v's Control                                                                                               |          | 0.6346 (ns)         | 0.0208 (*)          | 0.6831 (ns)         |
| Dab2 v's Control                                                                                               |          | 0.0376 (*)          | 0.07 (ns)           | 0.6831 (ns)         |
| Cyr61 v's Control                                                                                              |          | 0.1549 (ns)         | 0.2897 (ns)         | 0.6491 (ns)         |

**Table S6: Quantification of phenotypic changes upon overexpression of predicted Tead targets, ApoE, Dab2 and Cyr61 (refers to Fig. 7).**

**a.** Table showing the distribution of transfected cells upon overexpression of ApoE, Dab2 and Cyr61, compared to GFP control. **b.** Table showing quantification for Pax6<sup>+</sup>GFP<sup>+</sup> cells upon overexpression ApoE, Dab2 and Cyr61, compared to GFP control. **c.** Table showing quantification for Tbr1<sup>+</sup>GFP<sup>+</sup> cells upon overexpression of ApoE, Dab2 and Cyr61, compared to GFP control. **d.** Table showing quantification for Ctip2<sup>+</sup>GFP<sup>+</sup> cells upon overexpression of ApoE, Dab2 and Cyr61, compared to GFP control. **e.** Table showing quantification for Satb2<sup>+</sup>GFP<sup>+</sup> cells upon overexpression of ApoE, Dab2 and Cyr61, compared to GFP control.
